# Supplementary material for: Advancing the understanding of M–O covalency in isostructural M–OSiMe3 (M = Ce, Th, U) complexes
Source: Royal Society of Chemistry journal article supplement (doi:10.1039/d4nj03128h), 2024-01-01
Supplement: d4nj03128h1.pdf [file d4nj03128h1.pdf]

## SUPPLEMENTARY INFORMATION

### **Advancing understanding of comparison of M-O covalency in isostructural M-OSiMe<sub>3</sub> (M = Ce, Th, U) complexes**

Kang Liu<sup>a,b</sup>, Xiaowang Chi<sup>a,c</sup>, Yan Guo<sup>a</sup>, Kongqiu Hu<sup>a</sup>, Lei Mei<sup>a</sup>, Jipan Yu<sup>\*,a</sup> and Weiqun Shi<sup>\*,a</sup>

<sup>a</sup>Laboratory of Nuclear Energy Chemistry, Institute of High Energy Physics, Chinese Academy of Sciences, Beijing, 100049, China

<sup>b</sup>Spallation Neutron Source Science Center, Dongguan, 523803, China.

E-mail: yujipan@ihep.ac.cn; shiwq@ihep.ac.cn

<sup>c</sup>School of Resource & Safety Engineering, Wuhan Institute of Technology, Wuhan, 430073, China.

## Table of Contents

|                                                                                                                                                                       |    |
|-----------------------------------------------------------------------------------------------------------------------------------------------------------------------|----|
| Supplementary Figures and Tables.....                                                                                                                                 | 4  |
| Figure S1. The structure of the synthetic complexes and the labeled C-atomic numbers. ....                                                                            | 4  |
| Figure S2. $^1\text{H}$ NMR (500 MHz, 298 K) spectrum of B in benzene- $\text{d}_6$ .....                                                                             | 4  |
| Figure S3. $^{13}\text{C}$ $\{^1\text{H}\}$ NMR (125 MHz, 298 K) spectrum of B in benzene- $\text{d}_6$ .....                                                         | 5  |
| Figure S4. $^{29}\text{Si}$ $\{^1\text{H}\}$ NMR (99 MHz, 298 K) spectrum of B in benzene- $\text{d}_6$ . ....                                                        | 5  |
| Figure S5. $^1\text{H}$ - $^1\text{H}$ COSY ( $\text{C}_6\text{D}_6$ , 298 K) spectrum of B.....                                                                      | 6  |
| Figure S6. $^1\text{H}$ - $^{13}\text{C}$ HSQC ( $\text{C}_6\text{D}_6$ , 298 K) spectrum of B.....                                                                   | 6  |
| Figure S7. $^1\text{H}$ - $^{13}\text{C}$ HMBC ( $\text{C}_6\text{D}_6$ , 298 K) spectrum of B. ....                                                                  | 7  |
| Figure S8. $^1\text{H}$ NMR (500 MHz, 298 K) spectrum of 1Ce in benzene- $\text{d}_6$ .....                                                                           | 7  |
| Figure S9. $^{13}\text{C}$ $\{^1\text{H}\}$ NMR (125 MHz, 298 K) spectrum of 1Ce in benzene- $\text{d}_6$ .....                                                       | 8  |
| Figure S10. $^{29}\text{Si}$ $\{^1\text{H}\}$ NMR (99 MHz, 298 K) spectrum of 1Ce in benzene- $\text{d}_6$ . ....                                                     | 8  |
| Figure S11. $^1\text{H}$ - $^1\text{H}$ COSY ( $\text{C}_6\text{D}_6$ , 298 K) spectrum of 1Ce.....                                                                   | 9  |
| Figure S12. $^1\text{H}$ - $^{13}\text{C}$ HSQC ( $\text{C}_6\text{D}_6$ , 298 K) spectrum of 1Ce. ....                                                               | 9  |
| Figure S13. $^1\text{H}$ - $^{13}\text{C}$ HMBC ( $\text{C}_6\text{D}_6$ , 298 K) spectrum of 1Ce. ....                                                               | 10 |
| Figure S14. $^1\text{H}$ NMR (500 MHz, 298 K) spectrum of 2Ce in benzene- $\text{d}_6$ .....                                                                          | 10 |
| Figure S15. $^{13}\text{C}$ $\{^1\text{H}\}$ NMR (125 MHz, 298 K) spectrum of 2Ce in benzene- $\text{d}_6$ .....                                                      | 11 |
| Figure S16. $^{29}\text{Si}$ $\{^1\text{H}\}$ NMR (99 MHz, 298 K) spectrum of 2Ce in benzene- $\text{d}_6$ . ....                                                     | 11 |
| Figure S17. $^1\text{H}$ - $^1\text{H}$ COSY ( $\text{C}_6\text{D}_6$ , 298 K) spectrum of 2Ce.....                                                                   | 12 |
| Figure S18. $^1\text{H}$ - $^{13}\text{C}$ HSQC ( $\text{C}_6\text{D}_6$ , 298 K) spectrum of 2Ce. ....                                                               | 12 |
| Figure S19. $^1\text{H}$ - $^{13}\text{C}$ HMBC ( $\text{C}_6\text{D}_6$ , 298 K) spectrum of 2Ce. ....                                                               | 13 |
| Figure S20. $^1\text{H}$ NMR (500 MHz, 298 K) spectrum of 2Th in benzene- $\text{d}_6$ . ....                                                                         | 13 |
| Figure S21. $^{13}\text{C}$ $\{^1\text{H}\}$ NMR (125 MHz, 298 K) spectrum of 2Th in benzene- $\text{d}_6$ .....                                                      | 14 |
| Figure S22. $^{29}\text{Si}$ $\{^1\text{H}\}$ NMR (99 MHz, 298 K) spectrum of 2Th in benzene- $\text{d}_6$ . ....                                                     | 14 |
| Figure S23. $^1\text{H}$ - $^1\text{H}$ COSY ( $\text{C}_6\text{D}_6$ , 298 K) spectrum of 2Th. ....                                                                  | 15 |
| Figure S24. $^1\text{H}$ - $^{13}\text{C}$ HSQC ( $\text{C}_6\text{D}_6$ , 298 K) spectrum of 2Th.....                                                                | 15 |
| Figure S25. $^1\text{H}$ - $^{13}\text{C}$ HMBC ( $\text{C}_6\text{D}_6$ , 298 K) spectrum of 2Th.....                                                                | 16 |
| Figure S26. $^1\text{H}$ NMR (500 MHz, 298 K) spectrum of 2U in benzene- $\text{d}_6$ . ....                                                                          | 16 |
| Figure S27. $^{29}\text{Si}$ $\{^1\text{H}\}$ NMR (99 MHz, 298 K) spectrum of 2Th in benzene- $\text{d}_6$ . ....                                                     | 17 |
| Figure S28. UV-Vis-NIR of 2U (2.75 mM) in THF at 298 K.....                                                                                                           | 17 |
| Figure S29. Ionic radius linear fitting diagram of 5-coordinated $\text{M}^{4+}$ ( $\text{M} = \text{Ce}, \text{Th}$ and $\text{U}$ ) according to reference 64. .... | 18 |
| Figure S30. UV-Vis spectrum of 2U (0.4 mM) in THF at 298 K. ....                                                                                                      | 18 |
| Figure S31. UV-Vis spectrum of 2Ce (0.29 mM) in THF at 298 K.....                                                                                                     | 19 |
| Figure S32. UV-Vis spectrum of 2Th (0.35 mM) in THF at 298 K. ....                                                                                                    | 19 |
| Figure S33. FT-IR of B. ....                                                                                                                                          | 20 |
| Figure S34. FT-IR of 1Ce. ....                                                                                                                                        | 20 |
| Figure S35. FT-IR of 2Ce. ....                                                                                                                                        | 21 |
| Figure S36. FT-IR of 2Th.....                                                                                                                                         | 21 |
| Figure S37. FT-IR of 2U.....                                                                                                                                          | 22 |
| Table S1. Crystal data and structural refinement for complexes B and 1Ce.....                                                                                         | 22 |
| Table S2. Crystal data and structural refinement for complexes 2Ce, 2Th and 2U.....                                                                                   | 23 |

|                                                                                                                                                                                                                                                                                                                                                                                                                                                                                                     |    |
|-----------------------------------------------------------------------------------------------------------------------------------------------------------------------------------------------------------------------------------------------------------------------------------------------------------------------------------------------------------------------------------------------------------------------------------------------------------------------------------------------------|----|
| <b>Table S3. Selected bond lengths (Å) and angles (o) for complex B.</b> .....                                                                                                                                                                                                                                                                                                                                                                                                                      | 24 |
| <b>Table S4. Selected bond lengths (Å) and angles (o) for complex 1Ce.</b> .....                                                                                                                                                                                                                                                                                                                                                                                                                    | 24 |
| <b>Table S5. Selected bond lengths (Å) and angles (o) for complex 2Ce.</b> .....                                                                                                                                                                                                                                                                                                                                                                                                                    | 24 |
| <b>Table S6. Selected bond lengths (Å) and angles (o) for complex 2Th.</b> .....                                                                                                                                                                                                                                                                                                                                                                                                                    | 25 |
| <b>Table S7. Selected bond lengths (Å) and angles (o) for complex 2U.</b> .....                                                                                                                                                                                                                                                                                                                                                                                                                     | 25 |
| <b>Table S8. Shape analysis for the metal centers of 2M.</b> .....                                                                                                                                                                                                                                                                                                                                                                                                                                  | 25 |
| <b>Figure S38.</b> NOCV with larger deformation density ( $\Delta\rho$ ) of the main pairwise orbital interaction in 2Ce complex between the [Ce] and [OTMS] fragments together with the associated interaction energies $\Delta E_{\text{orb}}$ . The charge eigenvalues ( $\nu$ ) give an estimate of the relative size of the charge migration. The direction of the charge flow is red to blue, and hydrogen atoms have been omitted for clarity. The isodensity value is set to 0.0003 au..... | 26 |
| <b>Figure S39.</b> NOCV with larger deformation density ( $\Delta\rho$ ) of the main pairwise orbital interaction in 2Th complex between the [Th] and [OTMS] fragments together with the associated interaction energies $\Delta E_{\text{orb}}$ . The charge eigenvalues ( $\nu$ ) give an estimate of the relative size of the charge migration. The direction of the charge flow is red to blue, and hydrogen atoms have been omitted for clarity. The isodensity value is set to 0.0003 au..... | 27 |
| <b>Table S9. Final Coordinates of Geometry Optimized 2Ce.</b> .....                                                                                                                                                                                                                                                                                                                                                                                                                                 | 27 |
| <b>Table S10. Final Coordinates of Geometry Optimized 2Th.</b> .....                                                                                                                                                                                                                                                                                                                                                                                                                                | 30 |
| <b>Table S11. Final Coordinates of Geometry Optimized 2U.</b> .....                                                                                                                                                                                                                                                                                                                                                                                                                                 | 32 |

## Supplementary Figures and Tables

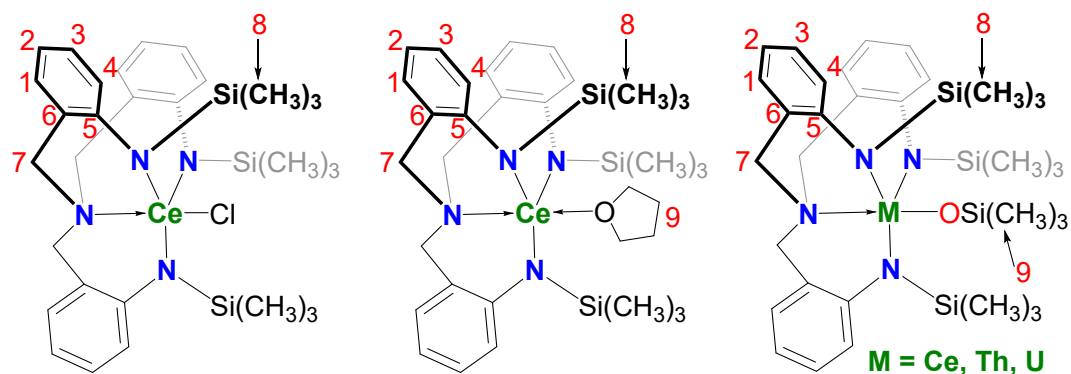

Figure S1. The structure of the synthetic complexes and the labeled C-atomic numbers.

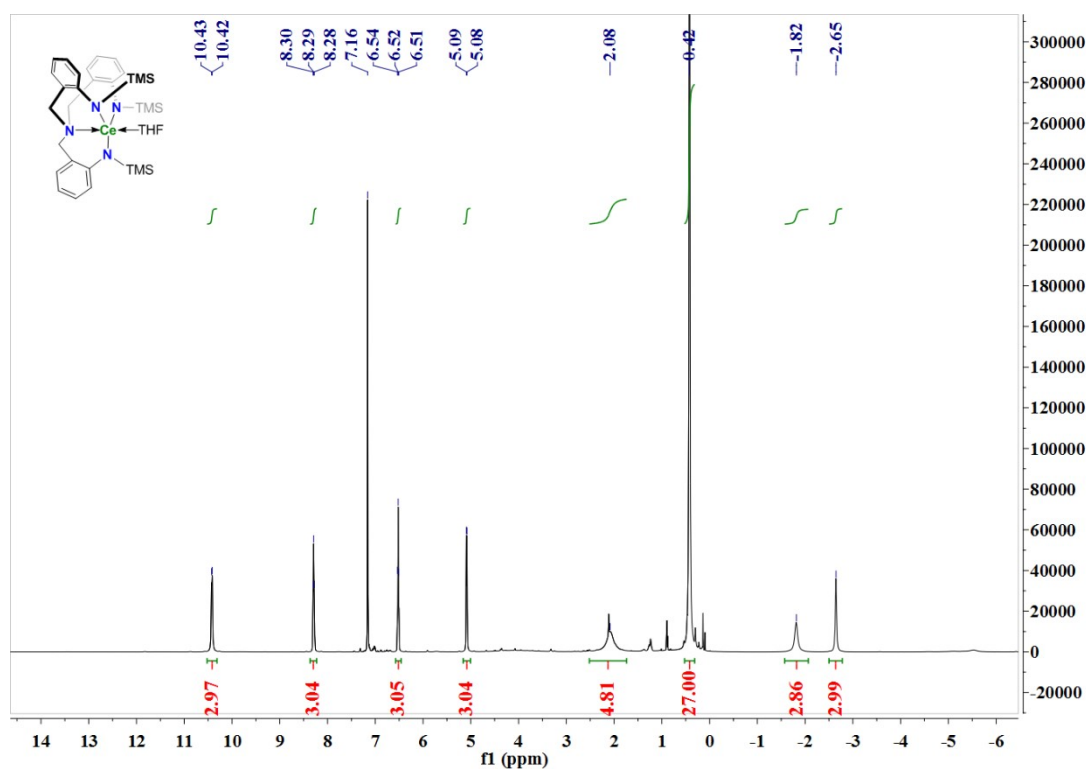

Figure S2. <sup>1</sup>H NMR (500 MHz, 298 K) spectrum of B in benzene-d<sub>6</sub>.

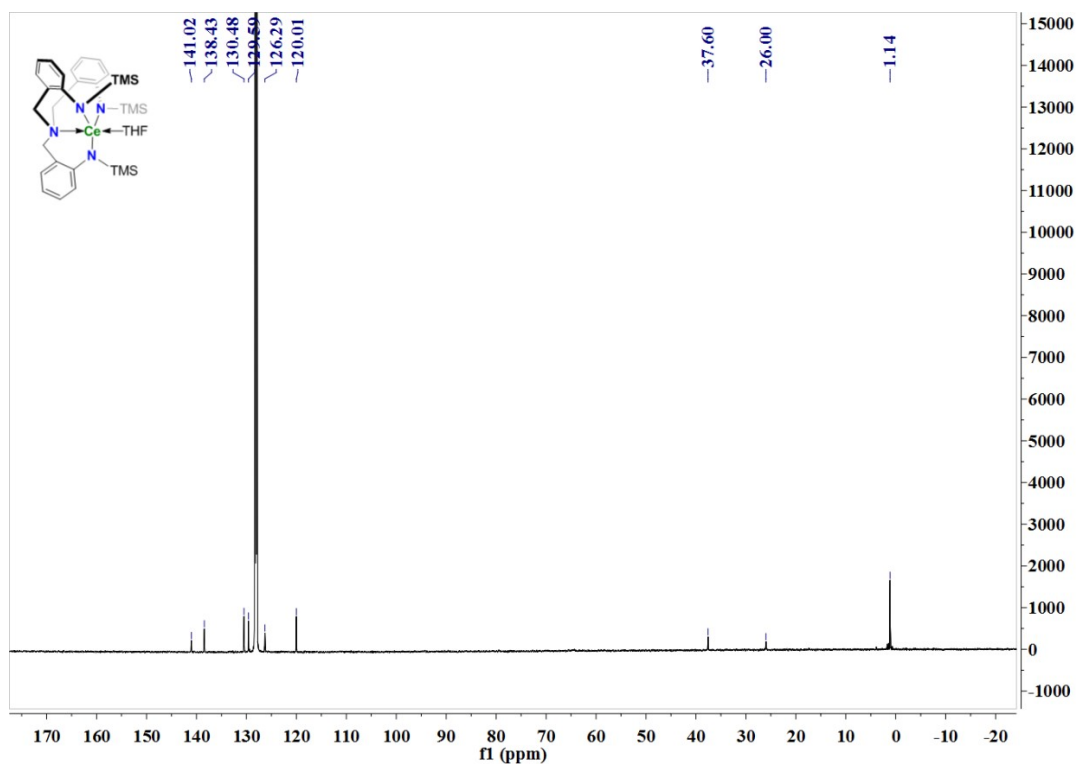

Figure S3.  $^{13}\text{C}$   $\{^1\text{H}\}$  NMR (125 MHz, 298 K) spectrum of B in benzene- $\text{d}_6$ .

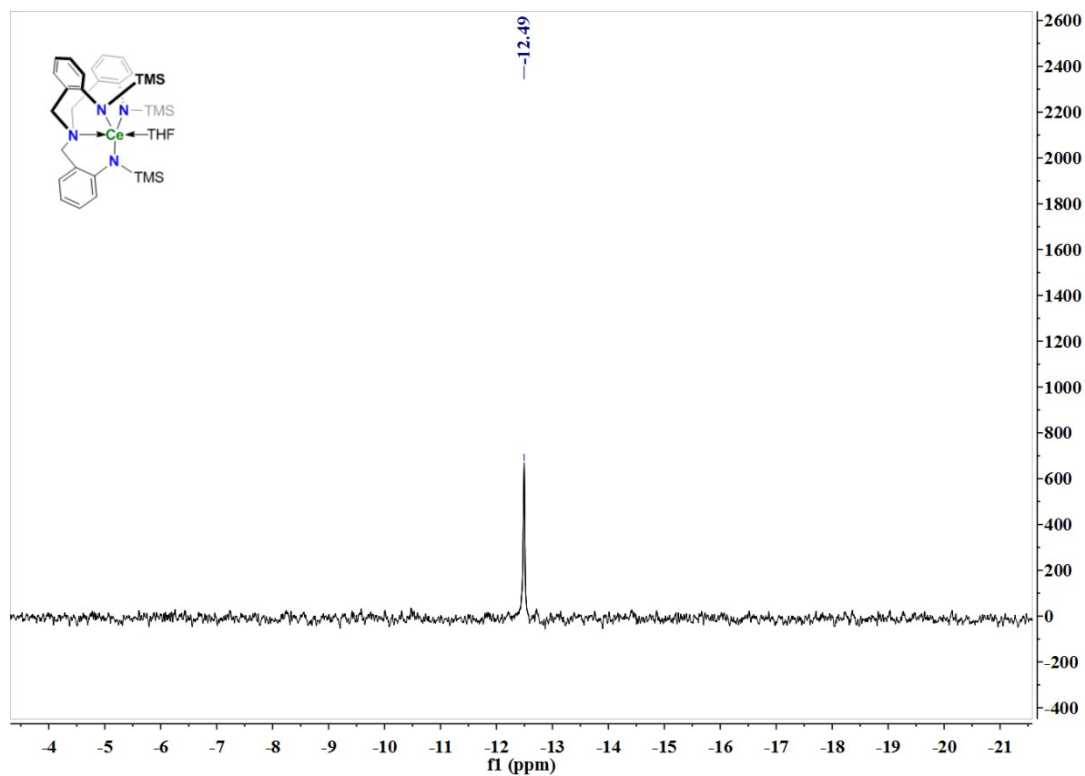

Figure S4.  $^{29}\text{Si}$   $\{^1\text{H}\}$  NMR (99 MHz, 298 K) spectrum of B in benzene- $\text{d}_6$ .

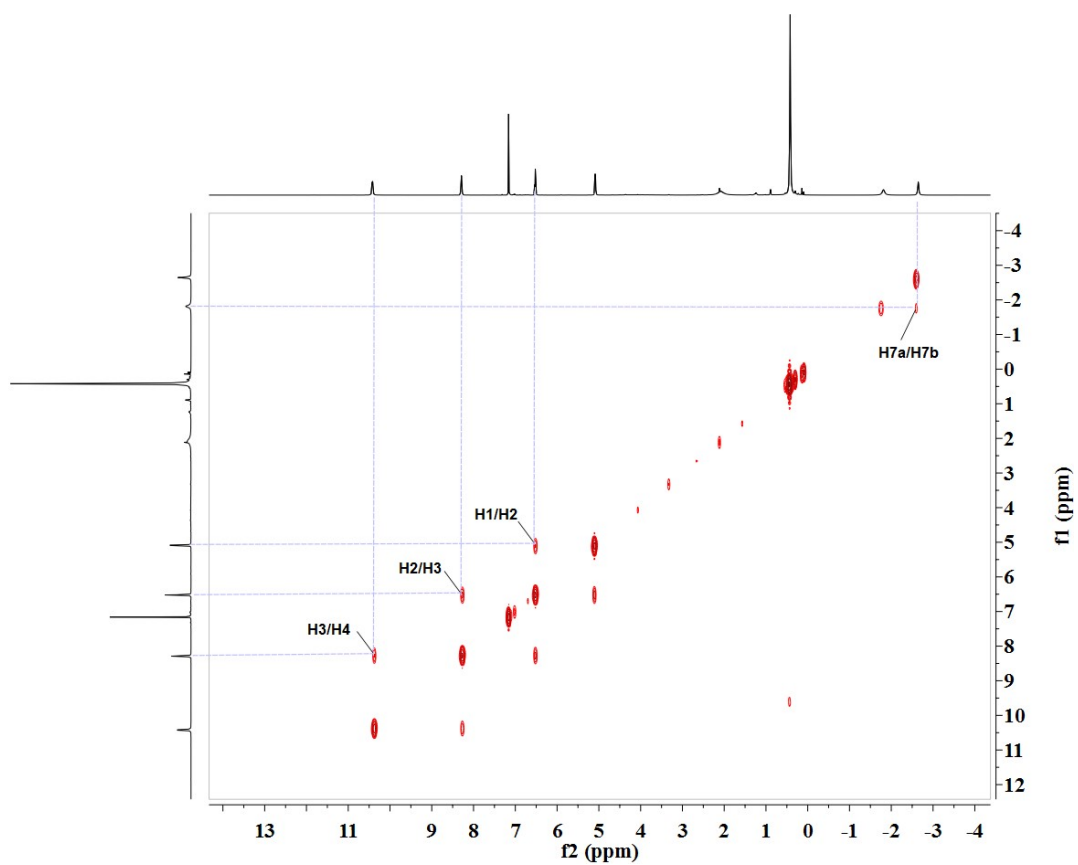

Figure S5.  $^1\text{H}$ - $^1\text{H}$  COSY ( $\text{C}_6\text{D}_6$ , 298 K) spectrum of B.

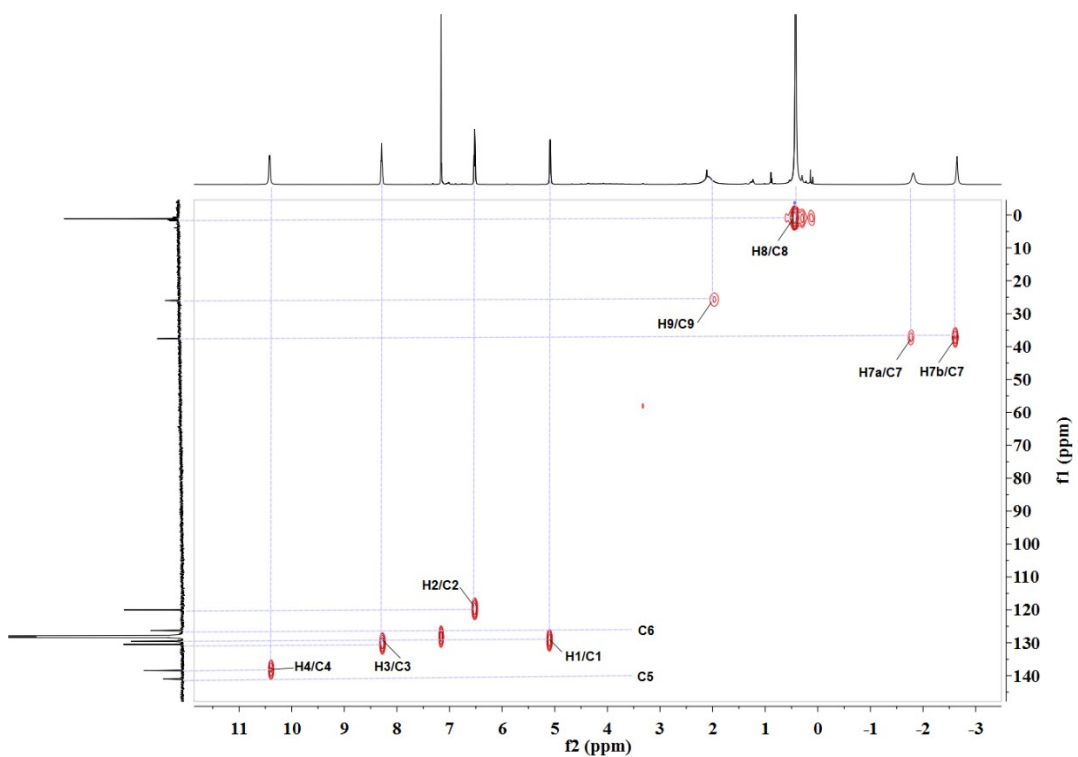

Figure S6.  $^1\text{H}$ - $^{13}\text{C}$  HSQC ( $\text{C}_6\text{D}_6$ , 298 K) spectrum of B.

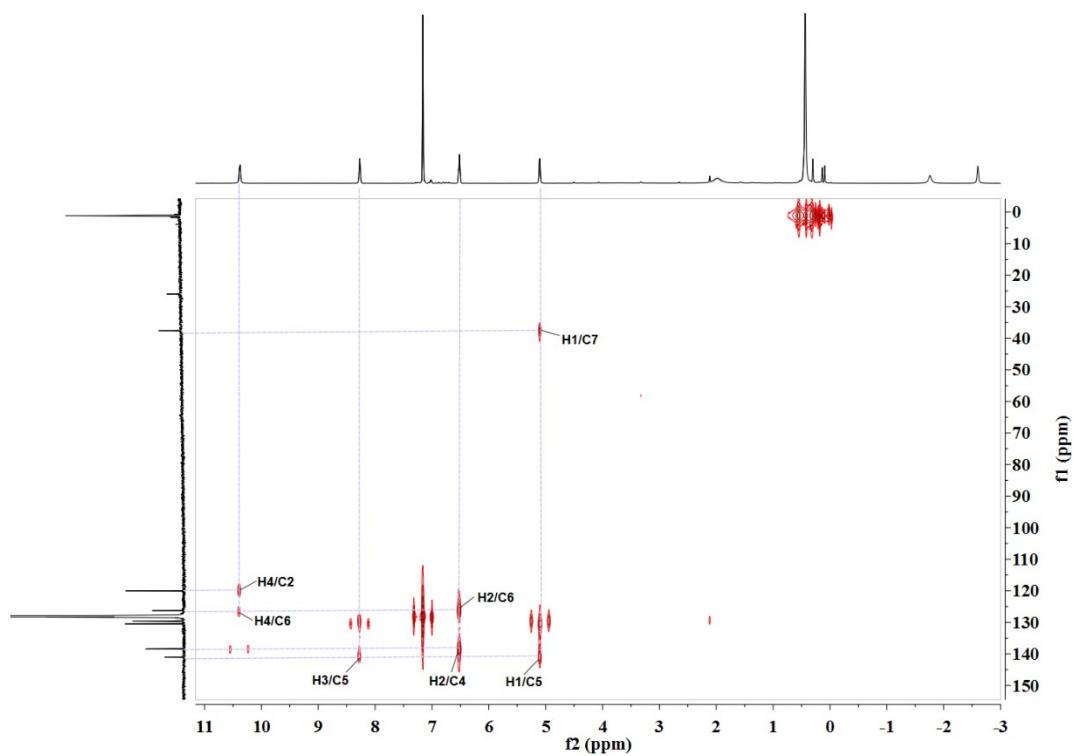

Figure S7.  $^1\text{H}$ - $^{13}\text{C}$  HMBC ( $\text{C}_6\text{D}_6$ , 298 K) spectrum of B.

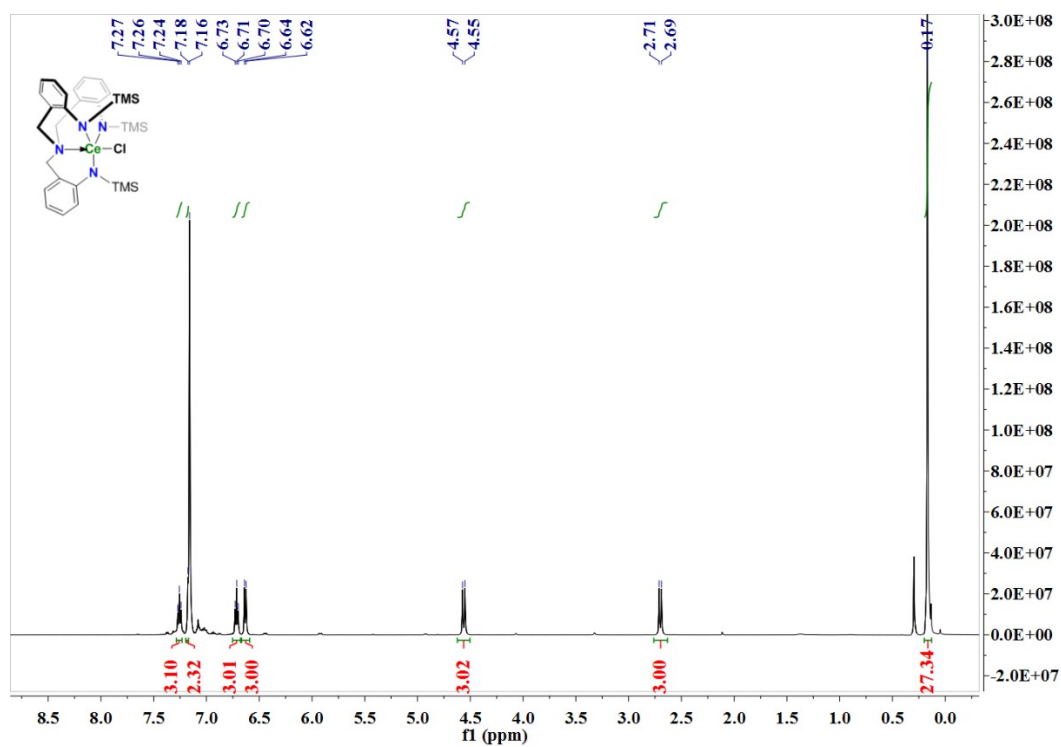

Figure S8.  $^1\text{H}$  NMR (500 MHz, 298 K) spectrum of 1Ce in benzene- $\text{d}_6$ .

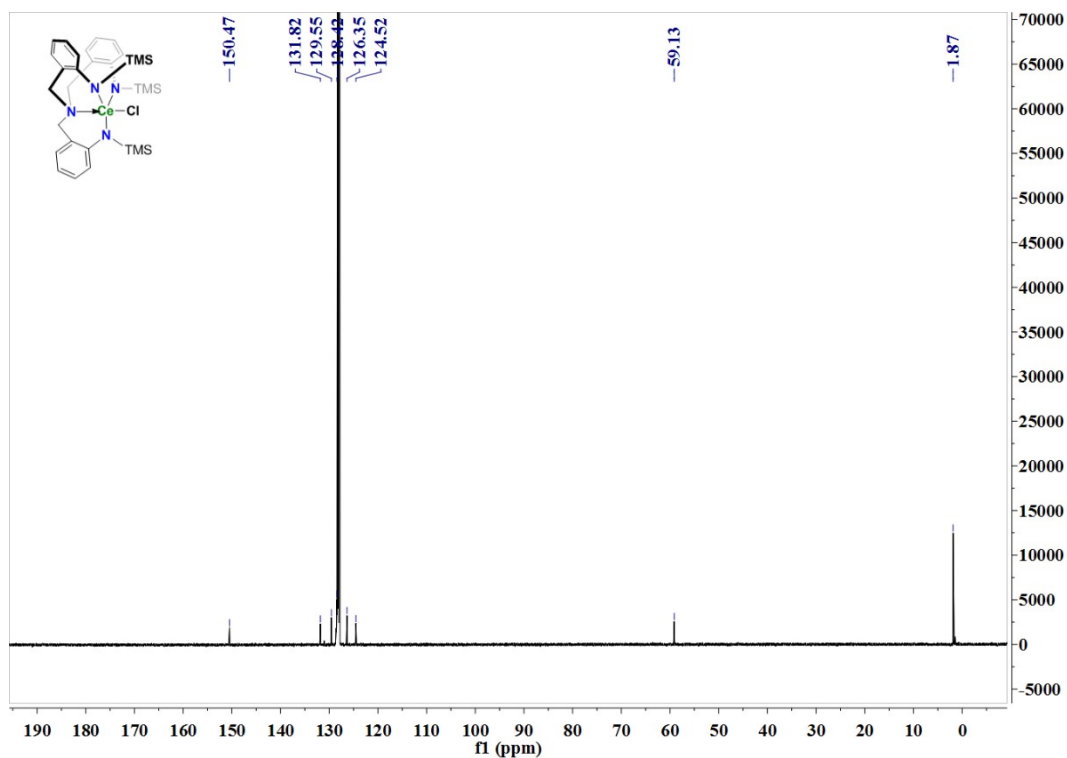

Figure S9.  $^{13}\text{C}$   $\{^1\text{H}\}$  NMR (125 MHz, 298 K) spectrum of 1Ce in benzene- $\text{d}_6$ .

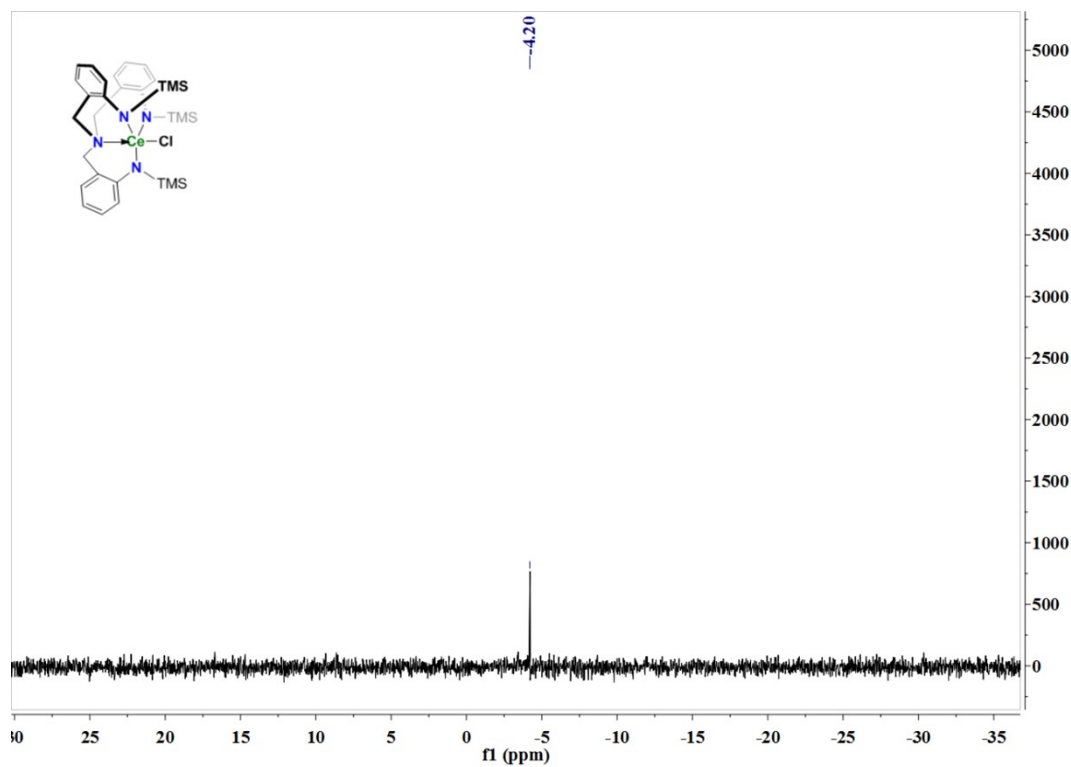

Figure S10.  $^{29}\text{Si}$   $\{^1\text{H}\}$  NMR (99 MHz, 298 K) spectrum of 1Ce in benzene- $\text{d}_6$ .



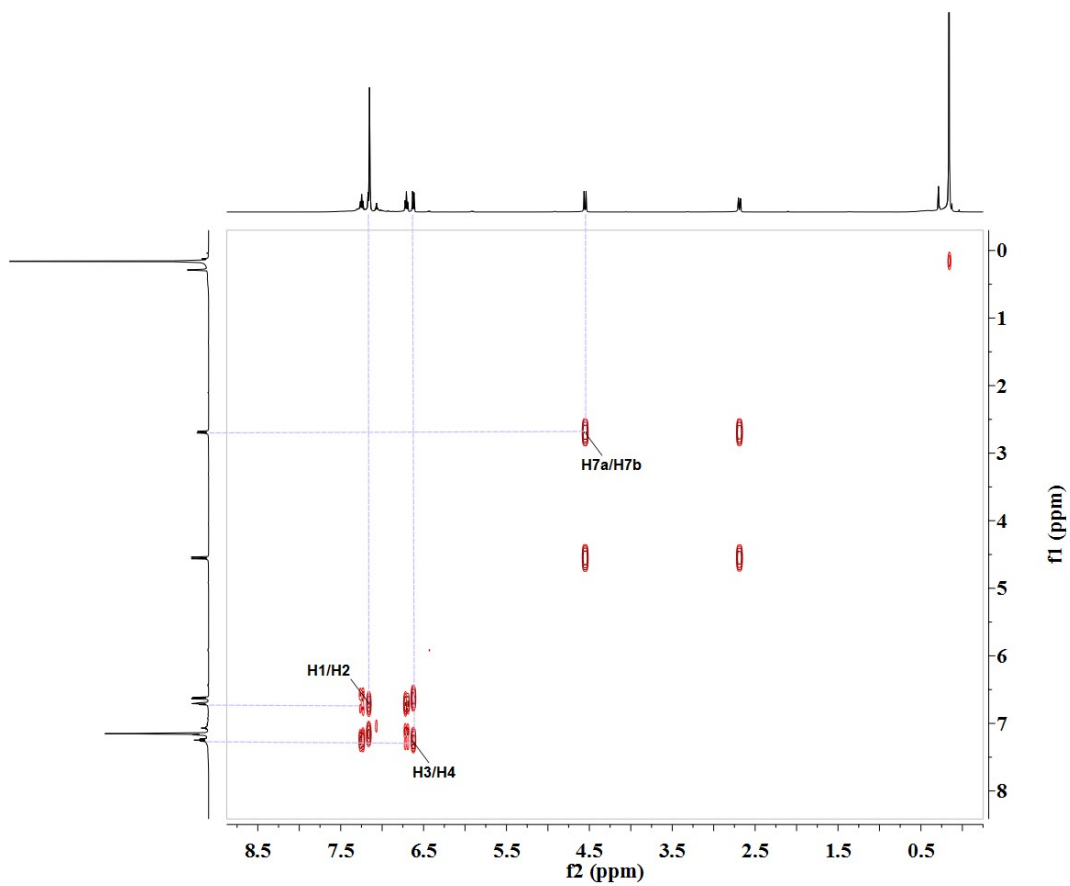

Figure S11.  $^1\text{H}$ - $^1\text{H}$  COSY ( $\text{C}_6\text{D}_6$ , 298 K) spectrum of 1Ce.

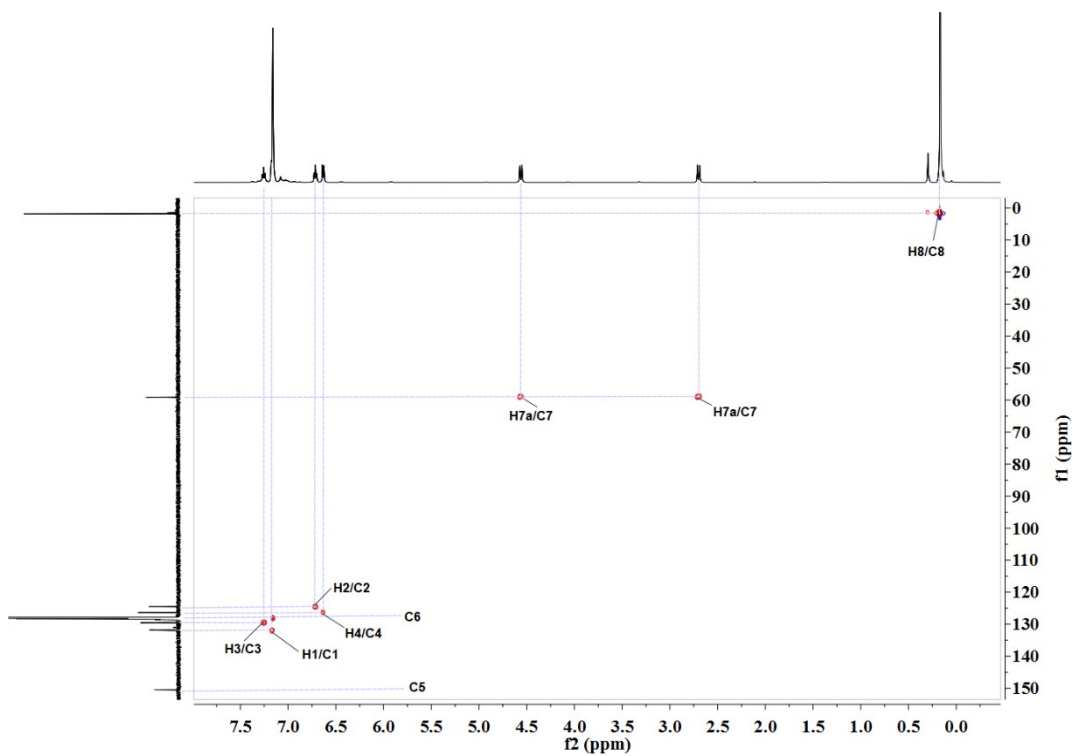

Figure S12.  $^1\text{H}$ - $^{13}\text{C}$  HSQC ( $\text{C}_6\text{D}_6$ , 298 K) spectrum of 1Ce.

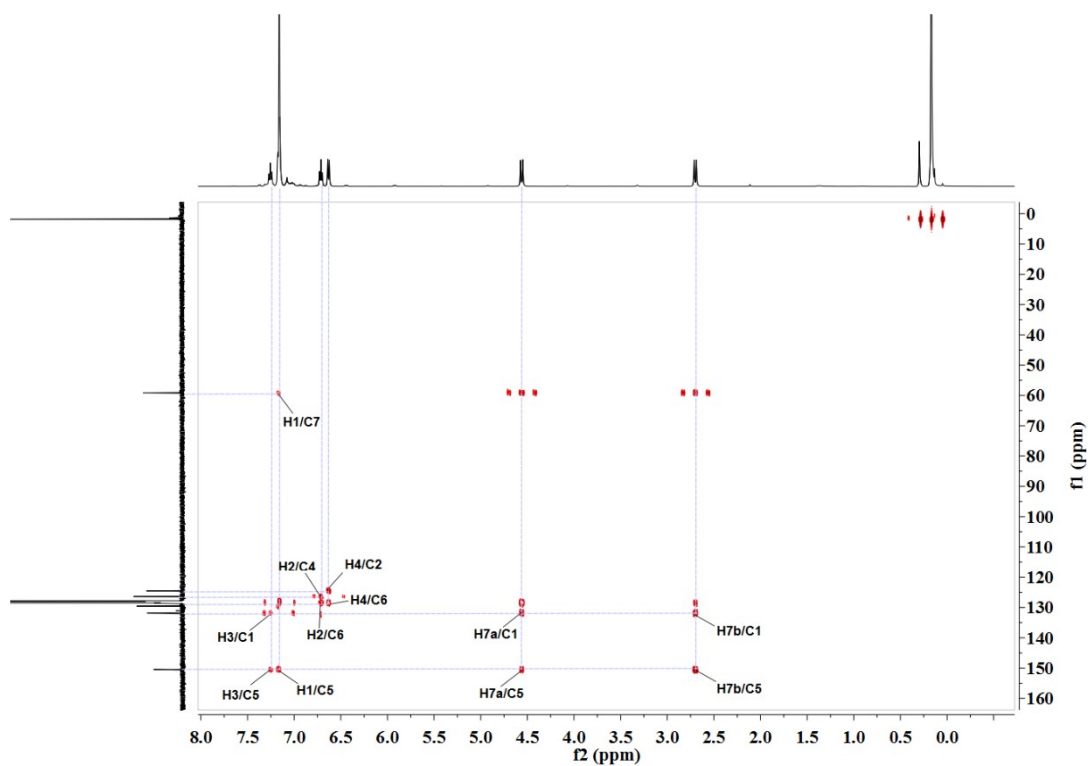

Figure S13.  $^1\text{H}$ - $^{13}\text{C}$  HMBC ( $\text{C}_6\text{D}_6$ , 298 K) spectrum of 1Ce.

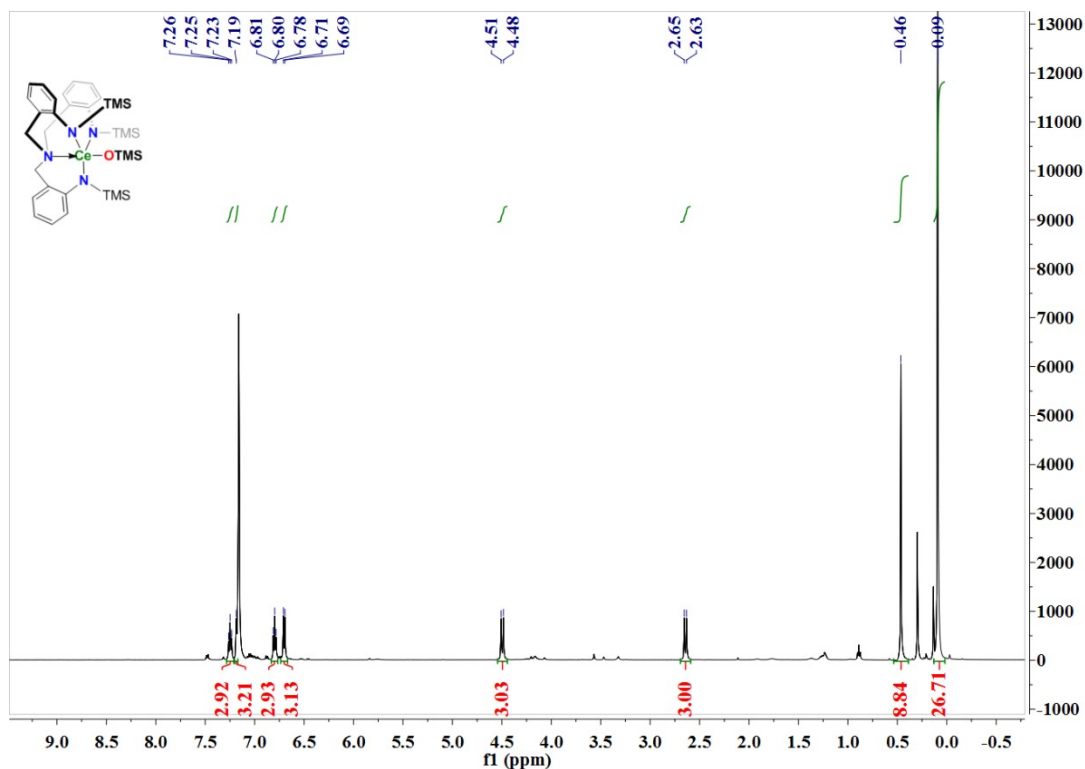

Figure S14.  $^1\text{H}$  NMR (500 MHz, 298 K) spectrum of 2Ce in benzene- $\text{d}_6$ .

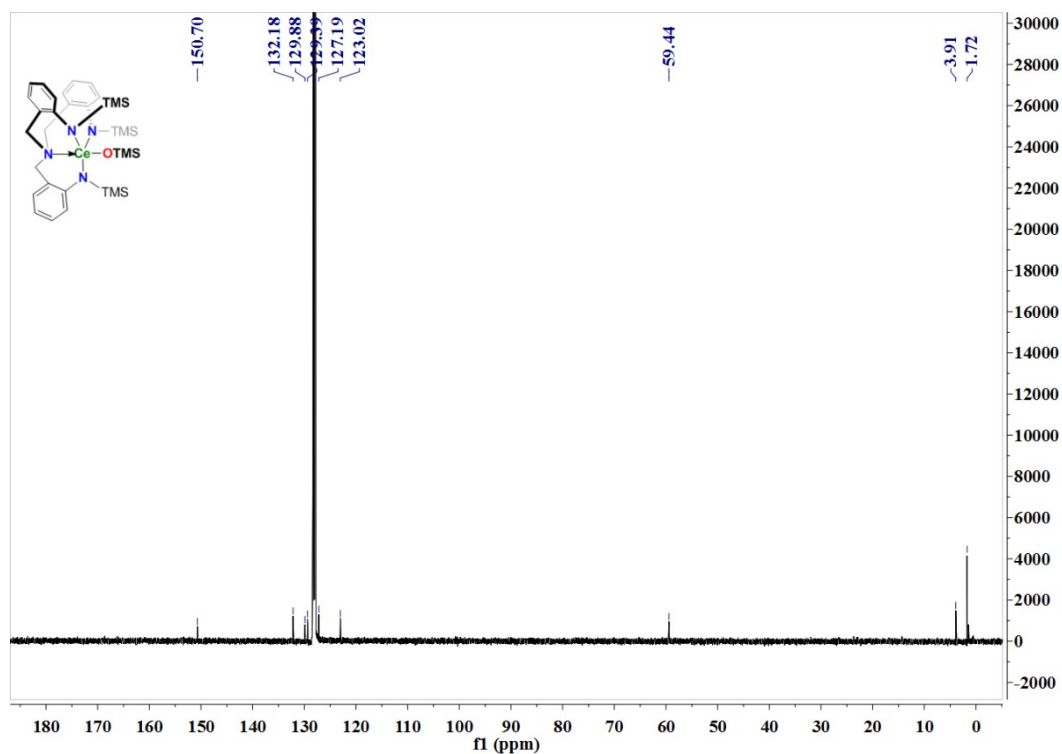

Figure S15.  $^{13}\text{C}$   $\{^1\text{H}\}$  NMR (125 MHz, 298 K) spectrum of 2Ce in benzene- $d_6$ .

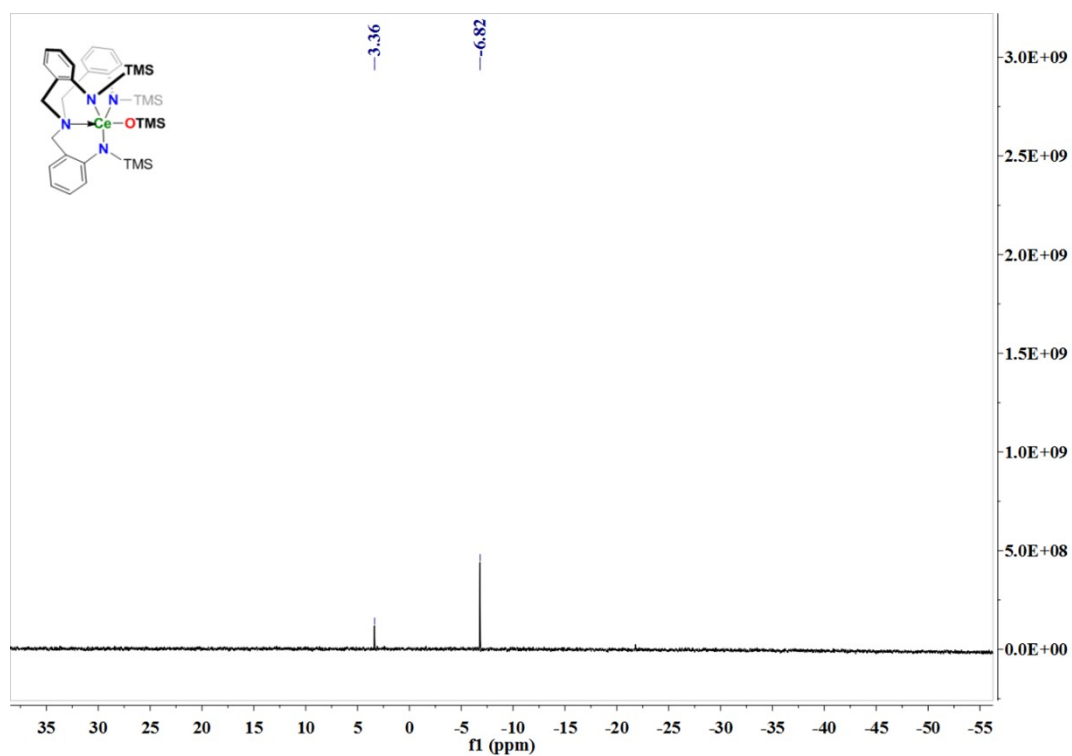

Figure S16.  $^{29}\text{Si}$   $\{^1\text{H}\}$  NMR (99 MHz, 298 K) spectrum of 2Ce in benzene- $d_6$ .

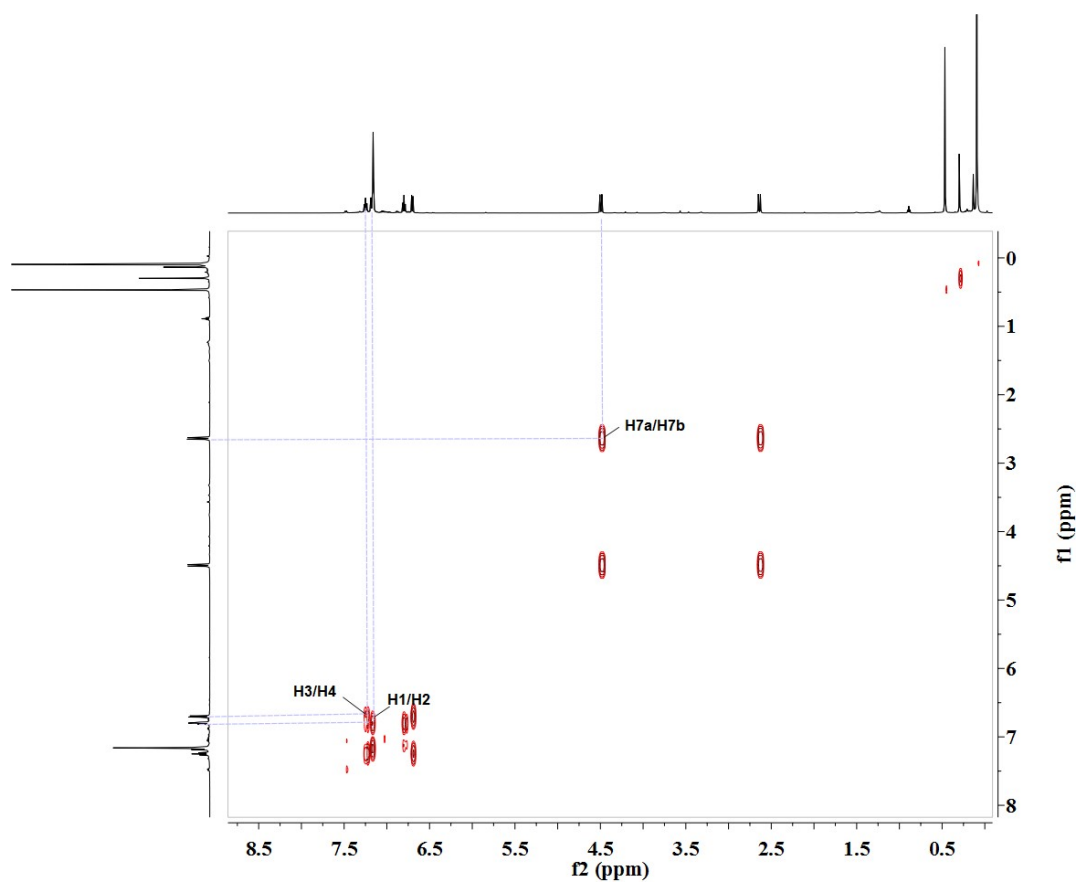

Figure S17.  $^1\text{H}$ - $^1\text{H}$  COSY ( $\text{C}_6\text{D}_6$ , 298 K) spectrum of 2Ce.

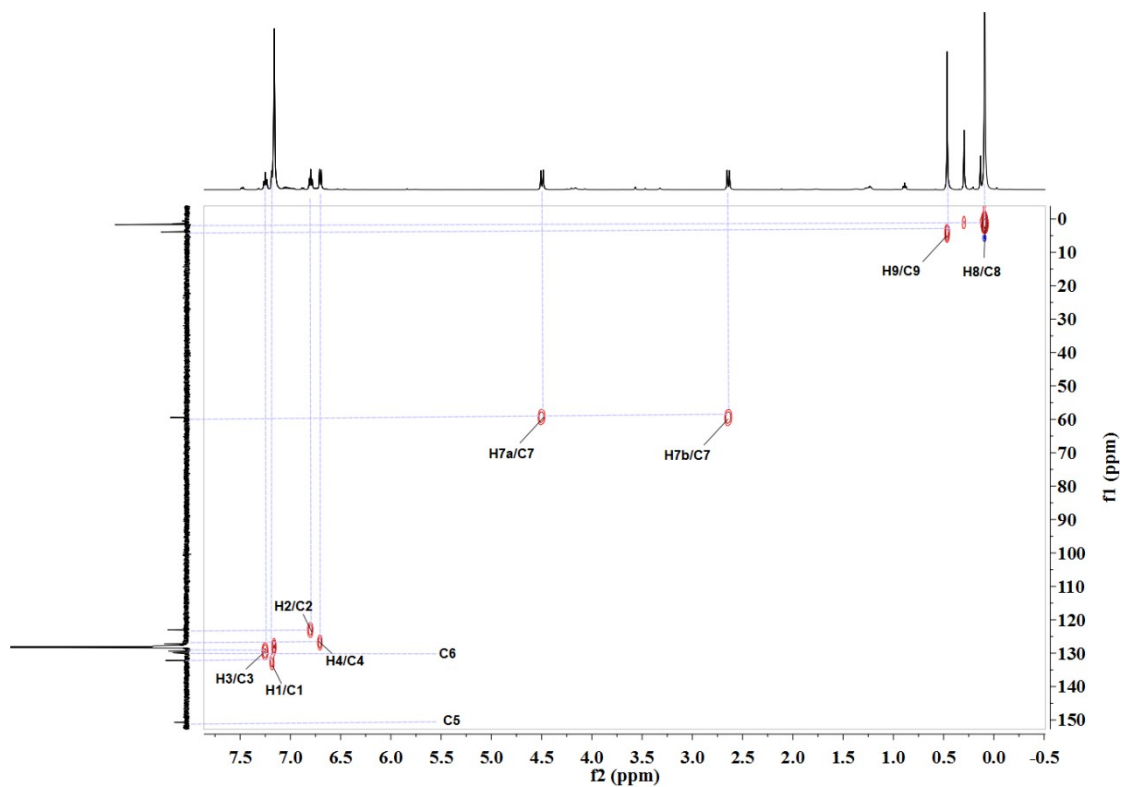

Figure S18.  $^1\text{H}$ - $^{13}\text{C}$  HSQC ( $\text{C}_6\text{D}_6$ , 298 K) spectrum of 2Ce.

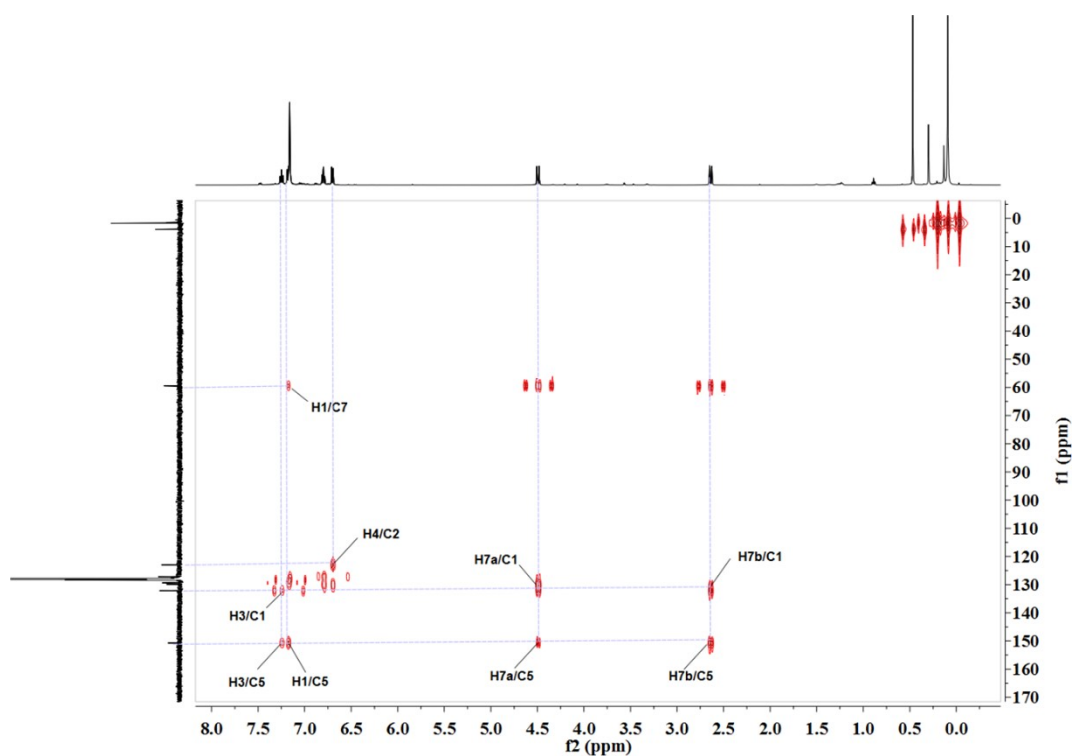

Figure S19.  $^1\text{H}$ - $^{13}\text{C}$  HMBC ( $\text{C}_6\text{D}_6$ , 298 K) spectrum of 2Ce.

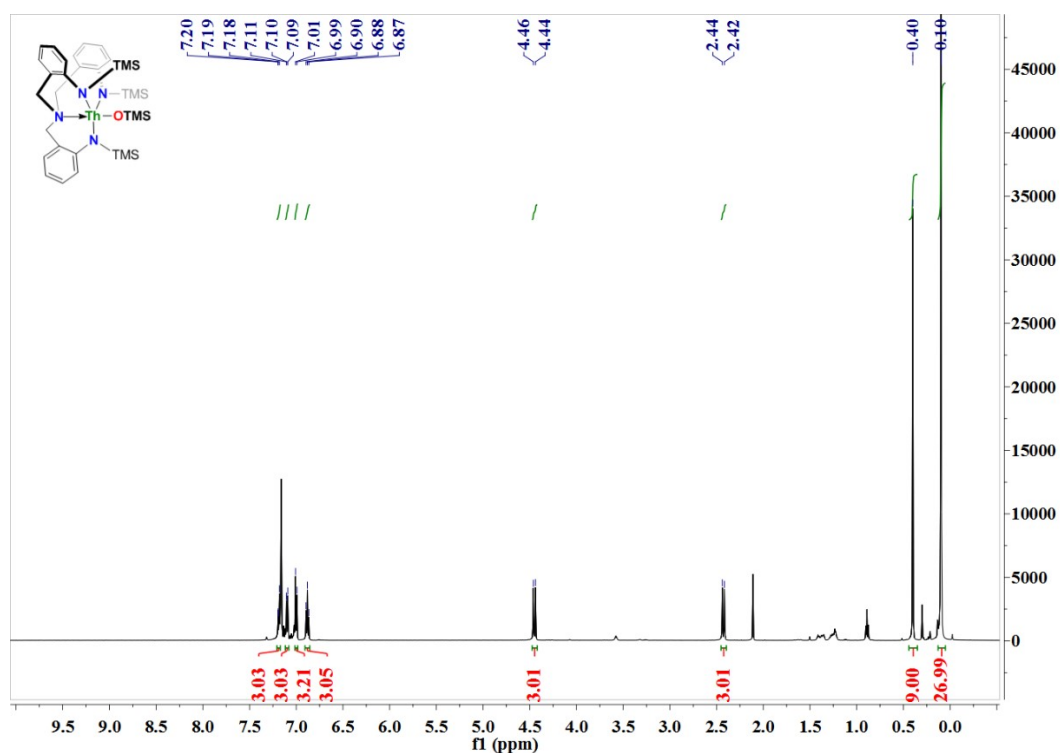

Figure S20.  $^1\text{H}$  NMR (500 MHz, 298 K) spectrum of 2Th in benzene- $\text{d}_6$ .

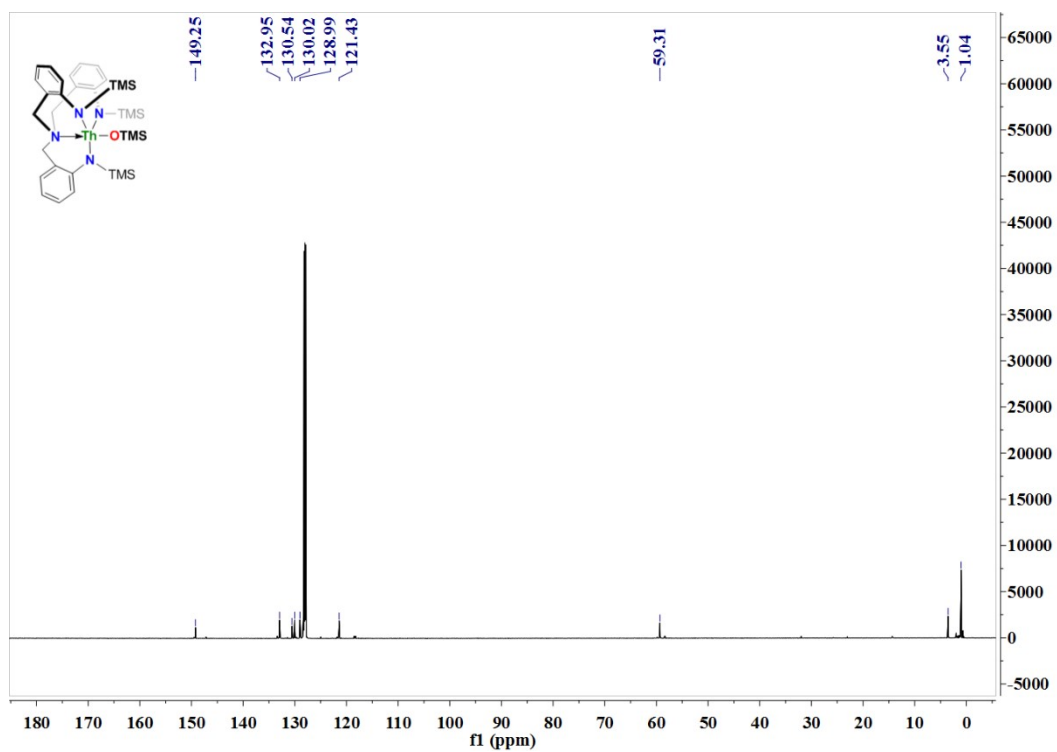

Figure S21.  $^{13}\text{C}$   $\{^1\text{H}\}$  NMR (125 MHz, 298 K) spectrum of 2Th in benzene- $\text{d}_6$ .

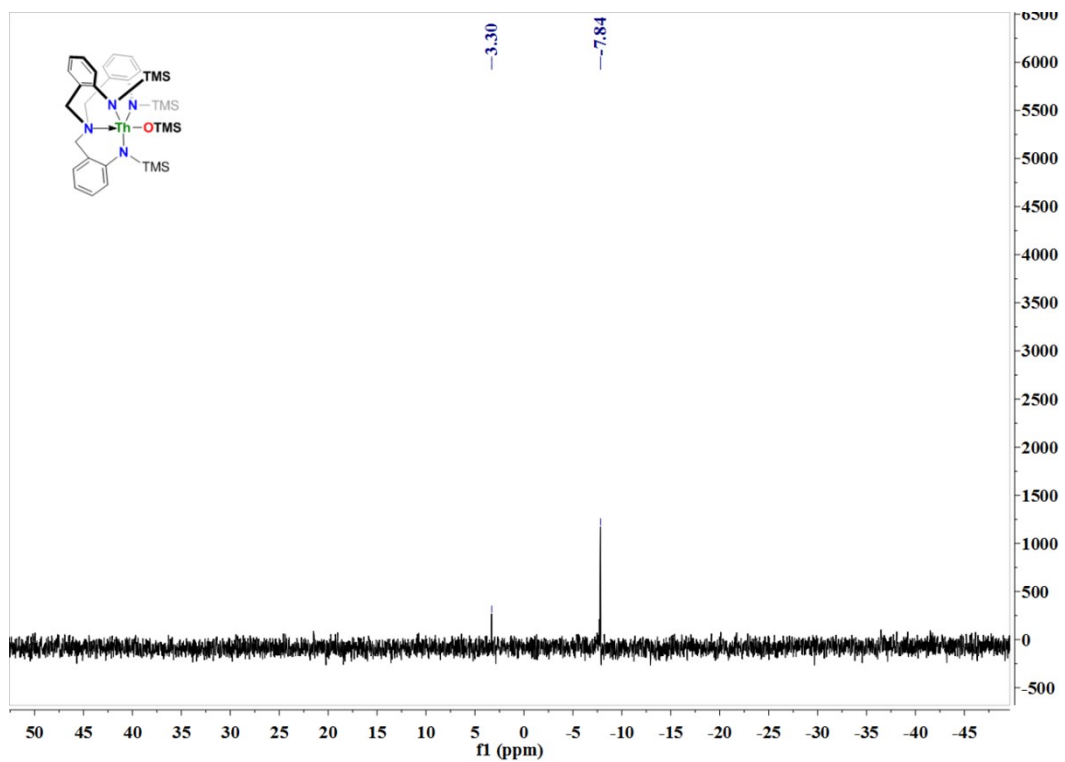

Figure S22.  $^{29}\text{Si}$   $\{^1\text{H}\}$  NMR (99 MHz, 298 K) spectrum of 2Th in benzene- $\text{d}_6$ .

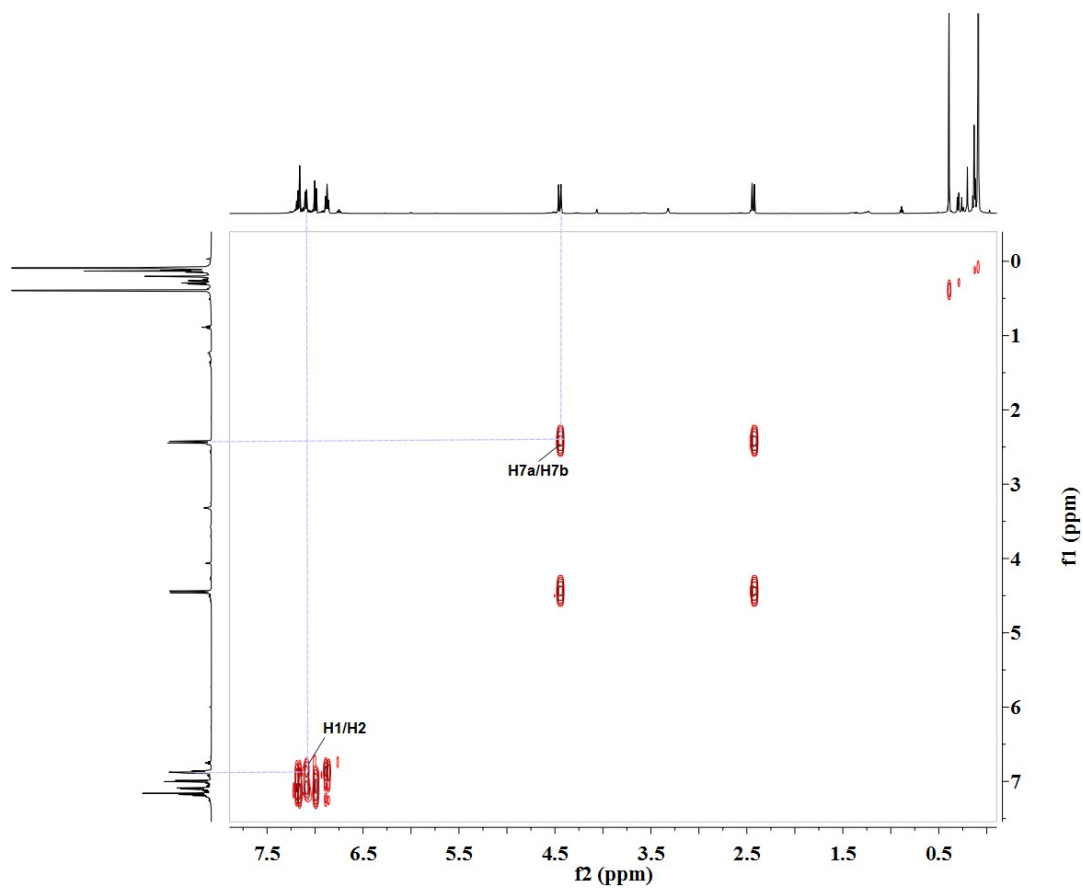

Figure S23.  $^1\text{H}$ - $^1\text{H}$  COSY ( $\text{C}_6\text{D}_6$ , 298 K) spectrum of 2Th.

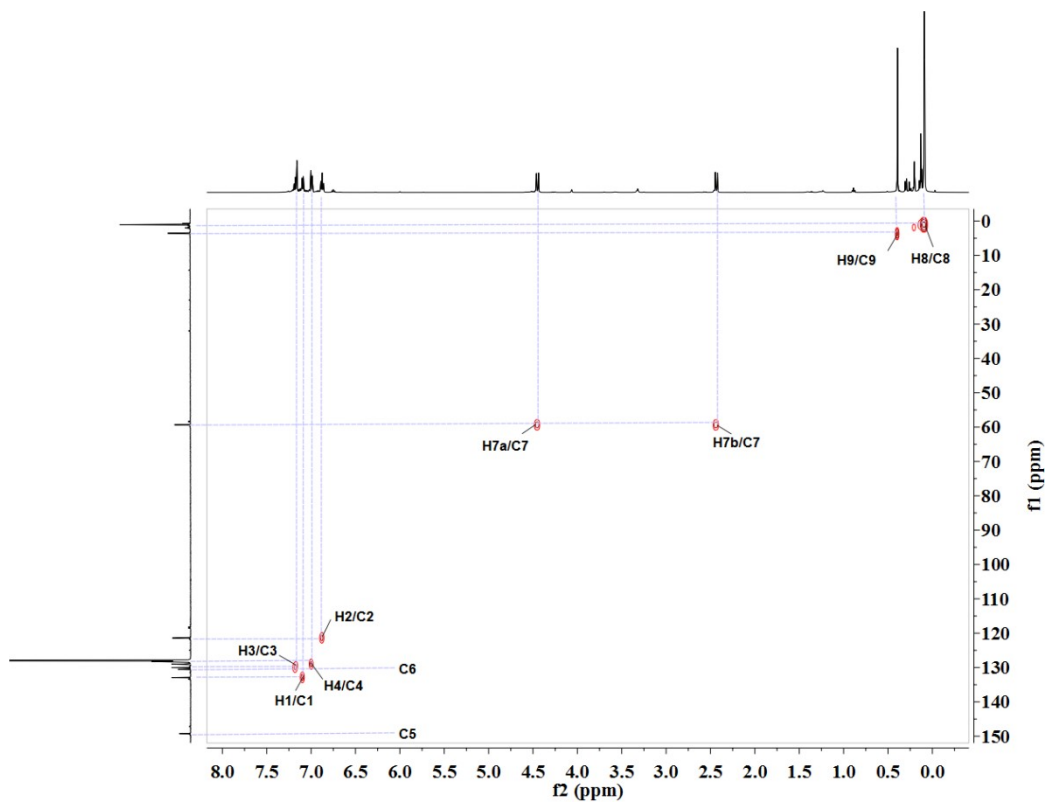

Figure S24.  $^1\text{H}$ - $^{13}\text{C}$  HSQC ( $\text{C}_6\text{D}_6$ , 298 K) spectrum of 2Th.

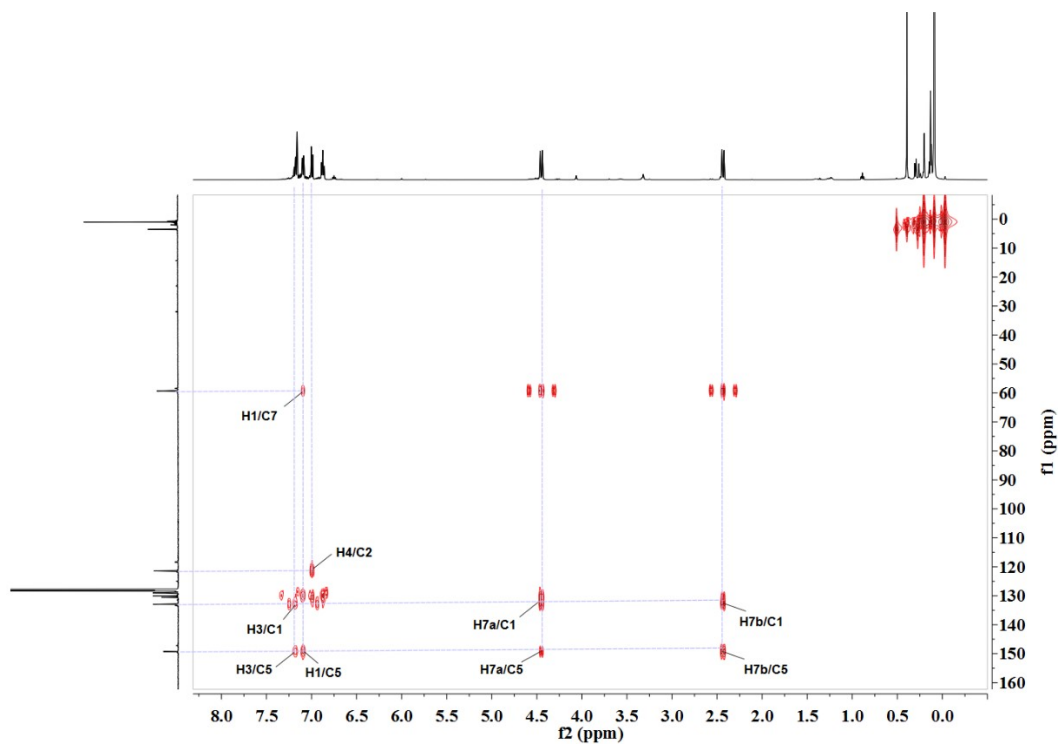

Figure S25.  $^1\text{H}$ - $^{13}\text{C}$  HMBC ( $\text{C}_6\text{D}_6$ , 298 K) spectrum of 2Th.

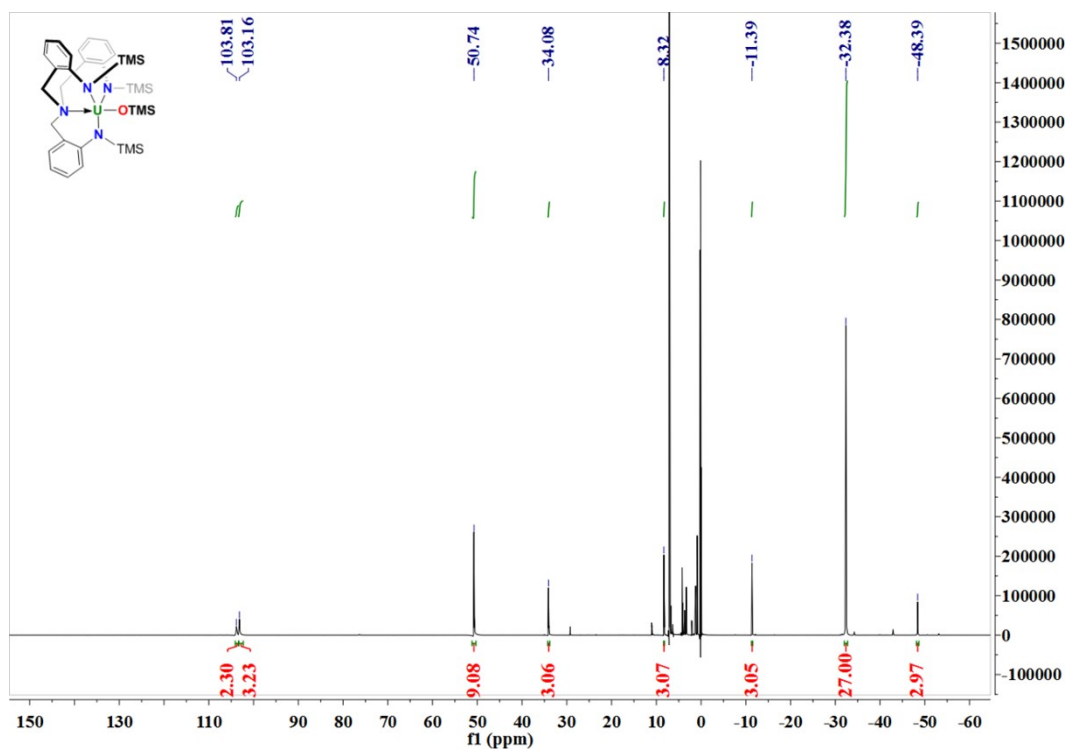

Figure S26.  $^1\text{H}$  NMR (500 MHz, 298 K) spectrum of 2U in benzene- $\text{d}_6$ .



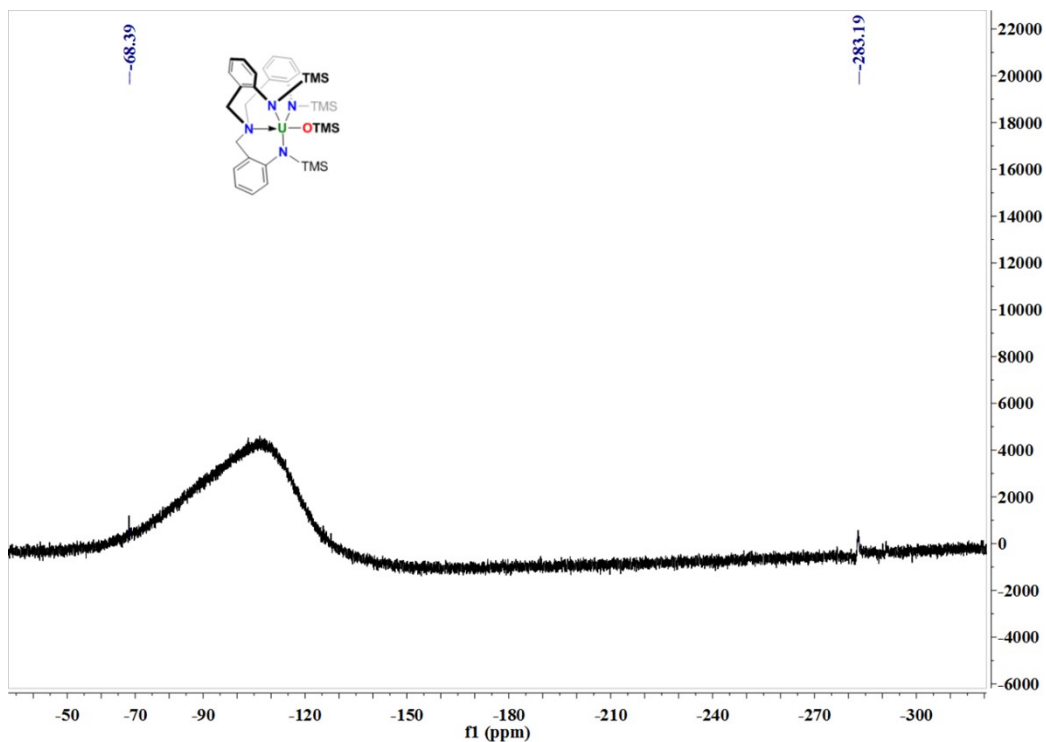

Figure S27.  $^{29}\text{Si}$   $\{^1\text{H}\}$  NMR (99 MHz, 298 K) spectrum of 2Th in benzene- $\text{d}_6$ .

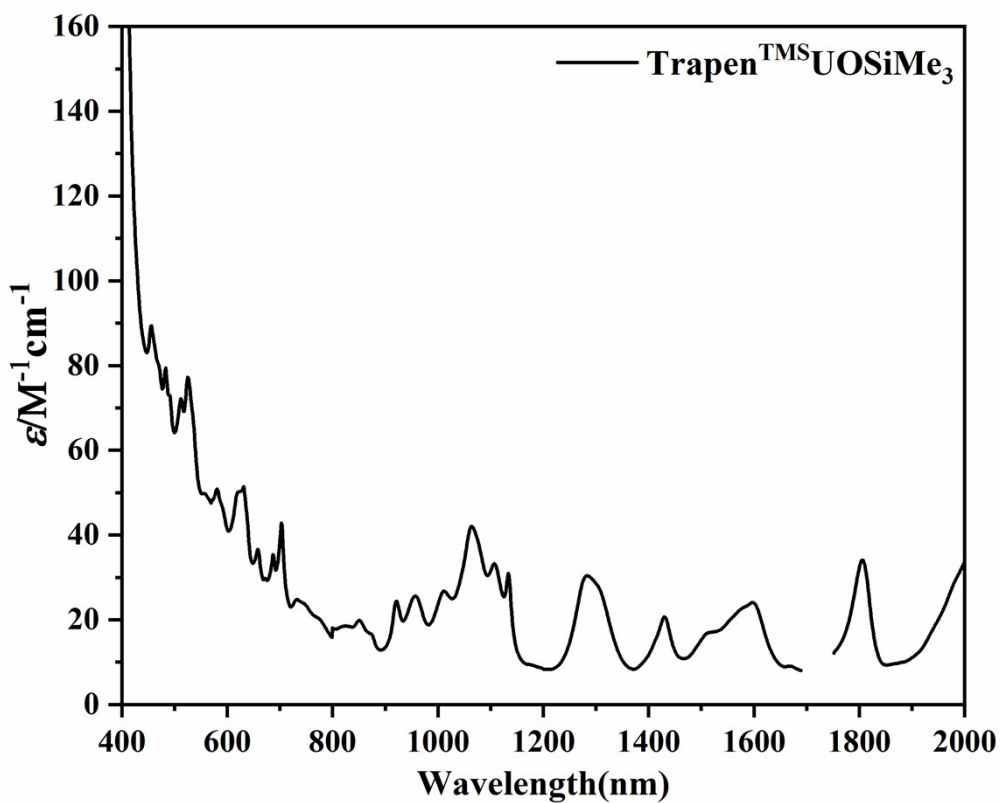

Figure S28. UV-Vis-NIR of 2U (2.75 mM) in THF at 298 K.

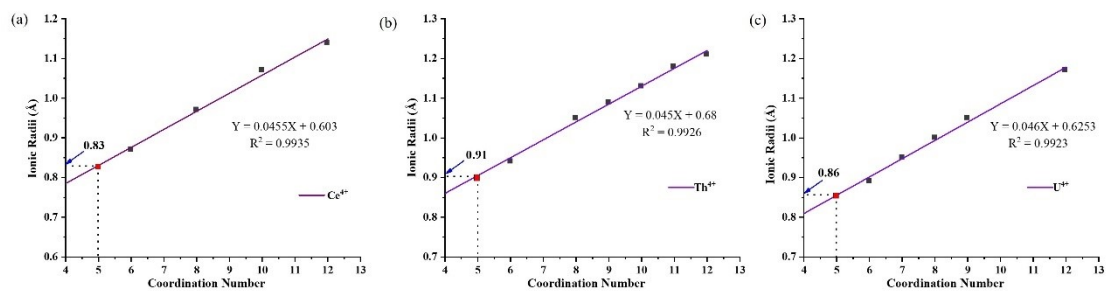

**Figure S29. Ionic radius linear fitting diagram of 5-coordinated  $M^{4+}$  ( $M = \text{Ce}$ ,  $\text{Th}$  and  $\text{U}$ ) according to reference 64.**

The coordination numbers of  $\text{Ce}^{4+}$  are provided in reference 64, which are 6, 8, 10 and 12, respectively. Linear regression analysis was performed for the ionic radius of  $\text{Ce}^{4+}$  using the least square method, where  $R^2$  value exceeds 0.99. It can be reasonably deduced that the ionic radius of 5-coordinated  $\text{Ce}^{4+}$  is 0.83 Å (see Figure S29). Similarly, the calculated ionic radius values for 5-coordinated  $\text{U}^{4+}$  and  $\text{Th}^{4+}$  are 0.86 Å, and 0.91 Å, respectively.

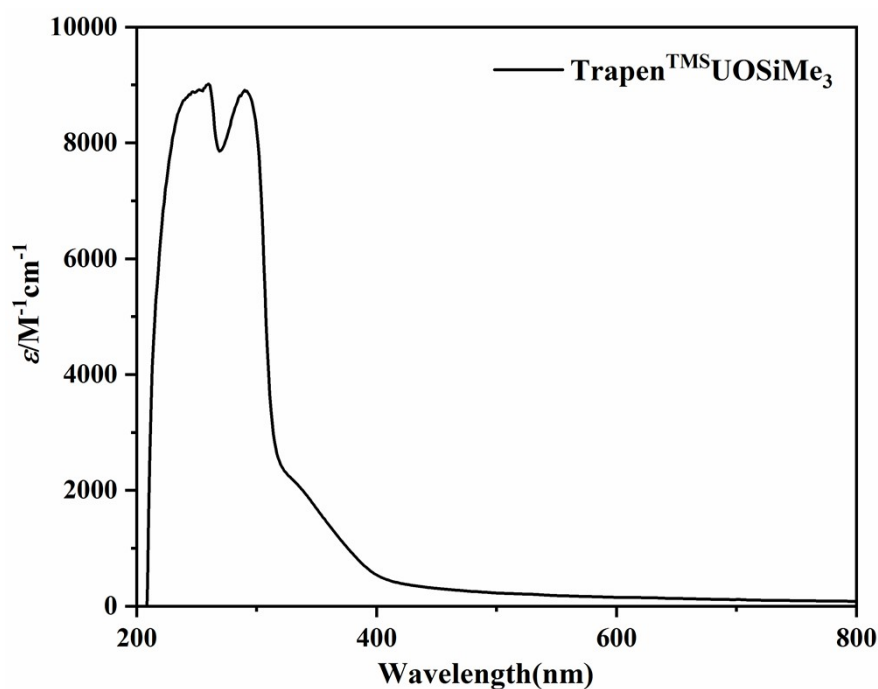

**Figure S30. UV-Vis spectrum of 2U (0.4 mM) in THF at 298 K.**

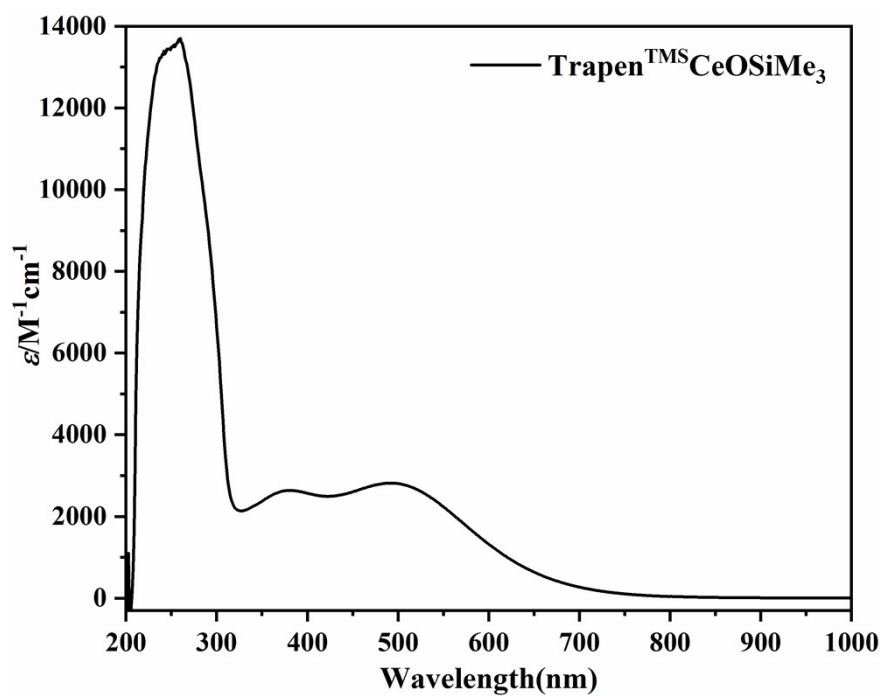

Figure S31. UV-Vis spectrum of 2Ce (0.29 mM) in THF at 298 K.

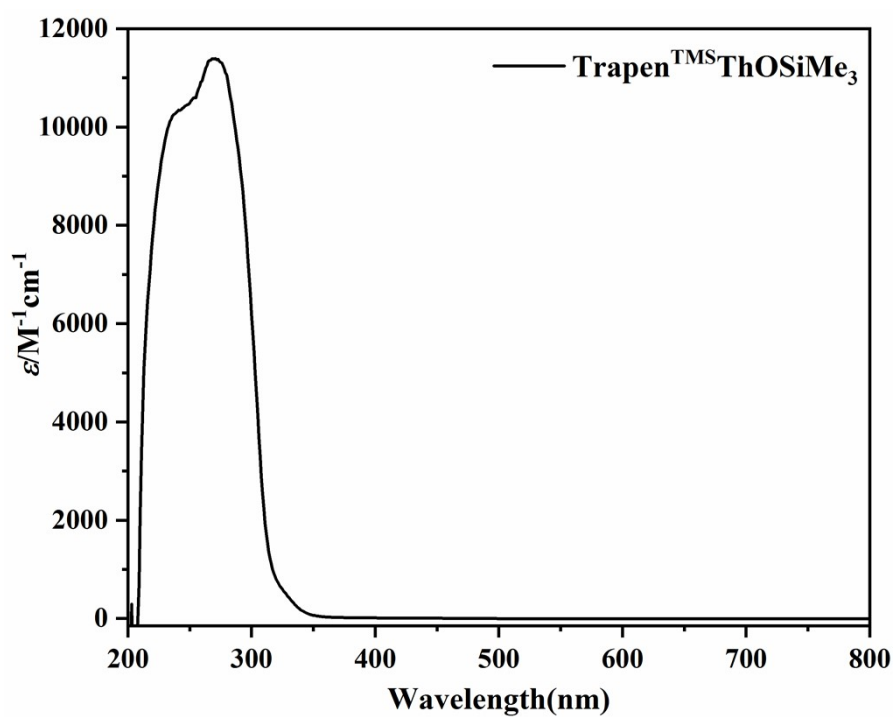

Figure S32. UV-Vis spectrum of 2Th (0.35 mM) in THF at 298 K.

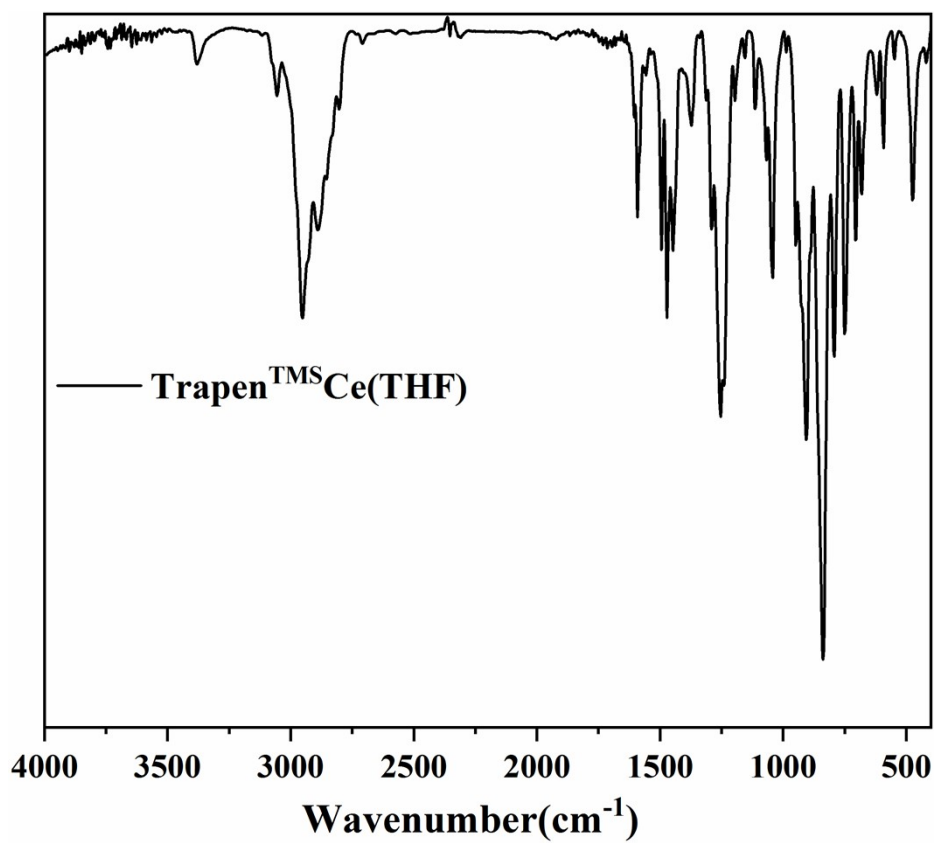

Figure S33. FT-IR of B.

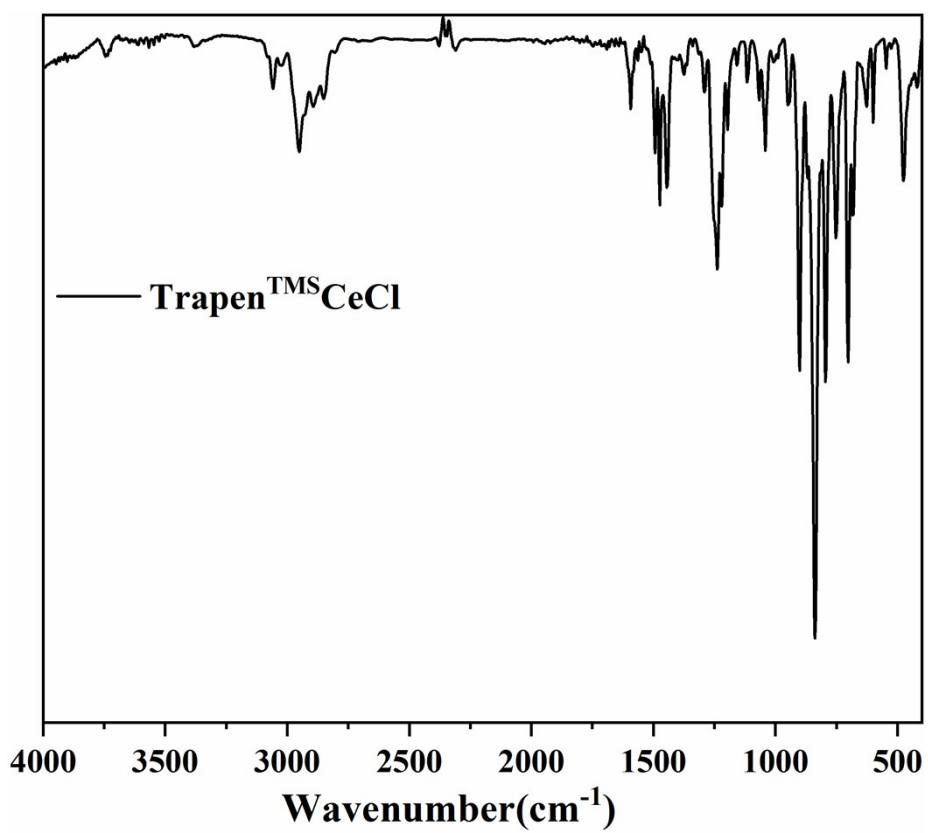

Figure S34. FT-IR of 1Ce.

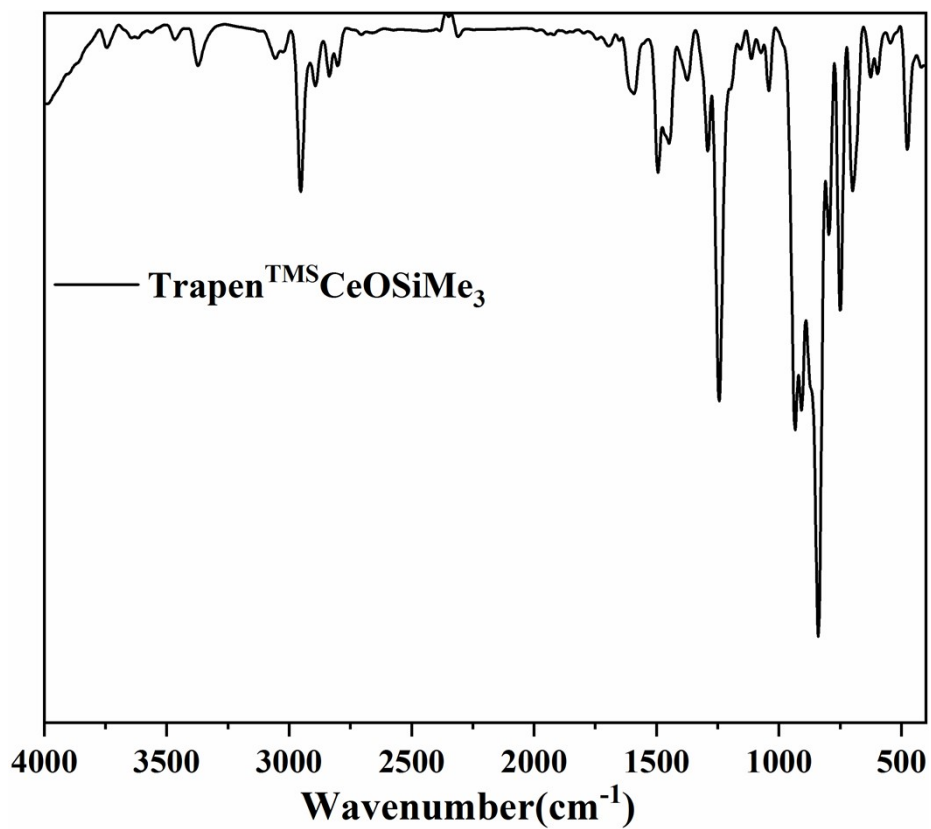

Figure S35. FT-IR of 2Ce.

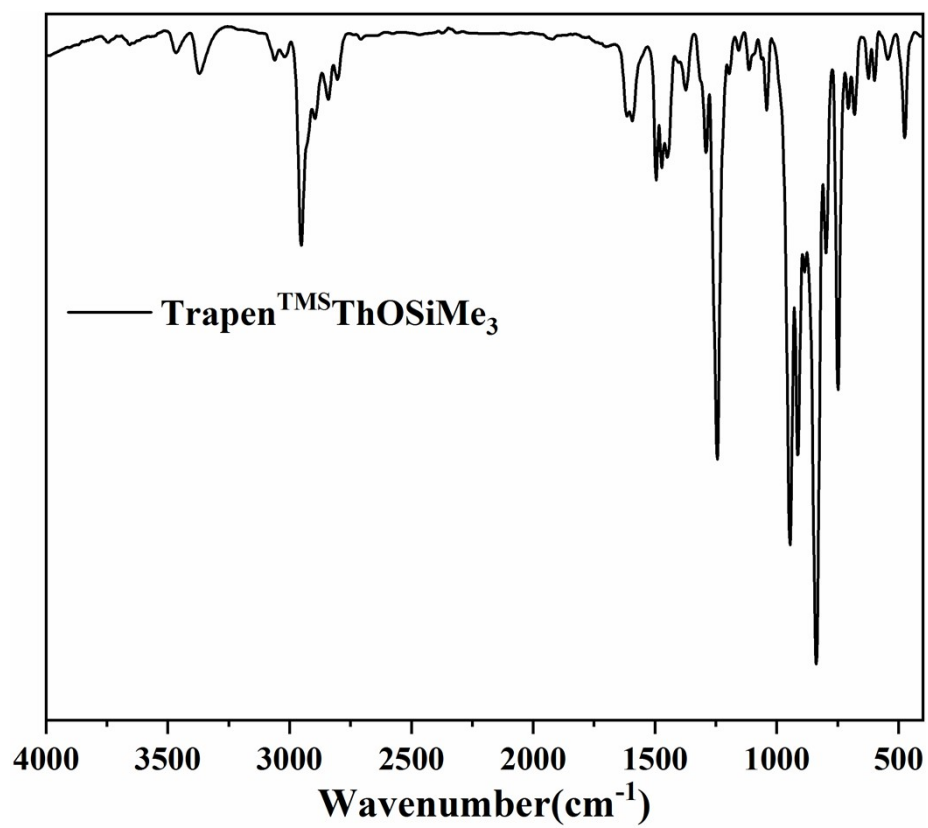

Figure S36. FT-IR of 2Th.

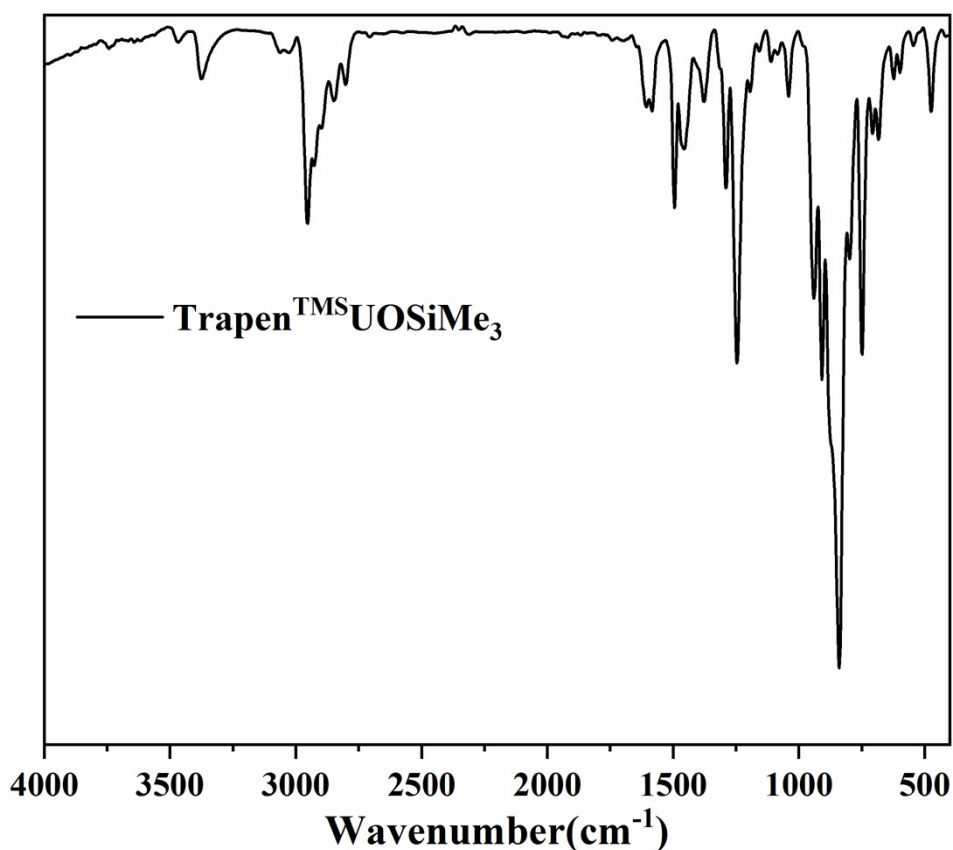

**Figure S37. FT-IR of 2U.**

**Table S1. Crystal data and structural refinement for complexes B and 1Ce.**

| Complex                                    | <b>B</b>                                                                                       | <b>1Ce</b>                                                         |
|--------------------------------------------|------------------------------------------------------------------------------------------------|--------------------------------------------------------------------|
| Empirical formula                          | C <sub>68</sub> H <sub>106</sub> Ce <sub>2</sub> N <sub>8</sub> O <sub>2</sub> Si <sub>6</sub> | C <sub>30</sub> H <sub>45</sub> CeClN <sub>4</sub> Si <sub>3</sub> |
| Formula weight (amu)                       | 1516.38                                                                                        | 721.54                                                             |
| Wavelength (Å)                             | 0.71073                                                                                        | 0.71073                                                            |
| Crystal system                             | monoclinic                                                                                     | monoclinic                                                         |
| Space group                                | <i>P2<sub>1</sub></i>                                                                          | <i>P2<sub>1</sub>/c</i>                                            |
| <i>a</i> (Å)                               | 10.1162(3)                                                                                     | 11.3841(4)                                                         |
| <i>b</i> (Å)                               | 19.3047(5)                                                                                     | 16.7664(7)                                                         |
| <i>c</i> (Å)                               | 19.5448(5)                                                                                     | 19.1613(7)                                                         |
| <i>α</i> (°)                               | 90                                                                                             | 90                                                                 |
| <i>β</i> (°)                               | 101.6510(10)                                                                                   | 106.4920(10)                                                       |
| <i>γ</i> (°)                               | 90                                                                                             | 90                                                                 |
| <i>V</i> (Å <sup>3</sup> )                 | 3738.26(18)                                                                                    | 3506.9(2)                                                          |
| <i>Z</i>                                   | 2                                                                                              | 4                                                                  |
| $\rho_{\text{calcd}}$ (g/cm <sup>3</sup> ) | 1.347                                                                                          | 1.367                                                              |
| $\mu$ (mm <sup>-1</sup> )                  | 1.344                                                                                          | 1.501                                                              |
| <i>F</i> 000 (e <sup>-</sup> )             | 1572.0                                                                                         | 1480.0                                                             |

|                                              |               |               |
|----------------------------------------------|---------------|---------------|
| Theta min/max (°)                            | 2.498/27.527  | 2.671/27.512  |
| Reflections collected                        | 50498         | 68583         |
| Independent reflections                      | 17044         | 8041          |
| $R_{\text{int}}$                             | 0.0218        | 0.0198        |
| Data/restr./param.                           | 17044/7/793   | 8041/0/362    |
| GOF                                          | 1.007         | 1.089         |
| $R_1/wR_2^a(I > 2\sigma(I))$                 | 0.0161/0.0353 | 0.0155/0.0386 |
| $R_1/wR_2^a(\text{all data})$                | 0.0172/0.0356 | 0.0164/0.0393 |
| Res.peak/hole( $e^- \cdot \text{\AA}^{-3}$ ) | 0.34/-0.23    | 0.44/-0.29    |

**Table S2. Crystal data and structural refinement for complexes 2Ce, 2Th and 2U.**

| Complex                                      | 2Ce                                                               | 2Th                                                                | 2U                                                                |
|----------------------------------------------|-------------------------------------------------------------------|--------------------------------------------------------------------|-------------------------------------------------------------------|
| Empirical formula                            | C <sub>33</sub> H <sub>54</sub> CeN <sub>4</sub> OSi <sub>4</sub> | C <sub>33</sub> H <sub>54</sub> N <sub>4</sub> OSi <sub>4</sub> Th | C <sub>33</sub> H <sub>54</sub> N <sub>4</sub> OSi <sub>4</sub> U |
| Formula weight (amu)                         | 775.28                                                            | 867.20                                                             | 873.19                                                            |
| Wavelength (Å)                               | 0.71073                                                           | 0.71073                                                            | 0.71073                                                           |
| Crystal system                               | trigonal                                                          | trigonal                                                           | trigonal                                                          |
| Space group                                  | <i>R3c</i>                                                        | <i>R3c</i>                                                         | <i>R3c</i>                                                        |
| <i>a</i> (Å)                                 | 16.9979(6)                                                        | 17.113(4)                                                          | 17.171(4)                                                         |
| <i>b</i> (Å)                                 | 16.9979(6)                                                        | 17.113(4)                                                          | 17.171(4)                                                         |
| <i>c</i> (Å)                                 | 23.6994(10)                                                       | 24.012(5)                                                          | 23.790(8)                                                         |
| $\alpha$ (°)                                 | 90                                                                | 90                                                                 | 90                                                                |
| $\beta$ (°)                                  | 90                                                                | 90                                                                 | 90                                                                |
| $\gamma$ (°)                                 | 120                                                               | 120                                                                | 120                                                               |
| <i>V</i> (Å <sup>3</sup> )                   | 5930.1(5)                                                         | 6090(3)                                                            | 6075(3)                                                           |
| <i>Z</i>                                     | 6                                                                 | 6                                                                  | 6                                                                 |
| $\rho_{\text{calcd}}$ (g/cm <sup>3</sup> )   | 1.303                                                             | 1.419                                                              | 1.432                                                             |
| $\mu$ (mm <sup>-1</sup> )                    | 1.302                                                             | 3.819                                                              | 4.155                                                             |
| <i>F</i> 000 (e <sup>-</sup> )               | 2412.0                                                            | 2604.0                                                             | 2616.0                                                            |
| Theta min/max (°)                            | 3.258/29.310                                                      | 3.231/27.472                                                       | 2.193/27.496                                                      |
| Reflections collected                        | 9847                                                              | 44299                                                              | 28533                                                             |
| Independent reflections                      | 2472                                                              | 3054                                                               | 3101                                                              |
| $R_{\text{int}}$                             | 0.0637                                                            | 0.0272                                                             | 0.0564                                                            |
| Data/restr./param.                           | 2472/1/134                                                        | 3054/1/133                                                         | 3101/121/134                                                      |
| GOF                                          | 1.050                                                             | 1.102                                                              | 0.892                                                             |
| $R_1/wR_2^a(I > 2\sigma(I))$                 | 0.0327/0.0830                                                     | 0.0109/0.0240                                                      | 0.0144/0.0326                                                     |
| $R_1/wR_2^a(\text{all data})$                | 0.0368/0.074                                                      | 0.0149/0.0256                                                      | 0.0212/0.0336                                                     |
| Res.peak/hole( $e^- \cdot \text{\AA}^{-3}$ ) | 0.43/-0.47                                                        | 0.21/-0.20                                                         | 0.20/-0.63                                                        |

**Table S3. Selected bond lengths (Å) and angles (°) for complex B.**

| Bond Lengths (Å) |           |           |            |           |           |
|------------------|-----------|-----------|------------|-----------|-----------|
| Ce1-N1           | 2.373(2)  | Ce1-N2    | 2.351(2)   | Ce1-N3    | 2.350(2)  |
| Ce1-N4           | 2.630(2)  | Ce1-O1    | 2.5839(19) |           |           |
| Bond angles (°)  |           |           |            |           |           |
| N1-Ce1-N2        | 121.96(7) | N1-Ce1-N3 | 115.12(7)  | N2-Ce1-N3 | 114.77(7) |
| O1-Ce1-N4        | 170.62(6) | N1-Ce1-N4 | 80.37(7)   | N2-Ce1-N4 | 81.09(7)  |
| N3-Ce1-N4        | 79.81(7)  |           |            |           |           |

**Table S4. Selected bond lengths (Å) and angles (°) for complex 1Ce.**

| Bond Lengths (Å) |            |           |            |           |            |
|------------------|------------|-----------|------------|-----------|------------|
| Ce1-Cl1          | 2.6561(4)  | Ce1-N1    | 2.2273(11) | Ce1-N2    | 2.1991(11) |
| Ce1-N3           | 2.2251(11) | Ce1-N4    | 2.6347(11) |           |            |
| Bond angles (°)  |            |           |            |           |            |
| N1-Ce1-N2        | 116.26(4)  | N1-Ce1-N3 | 113.47(4)  | N2-Ce1-N3 | 121.53(4)  |
| Cl1-Ce1-N4       | 172.02(3)  | N1-Ce1-N4 | 80.90(4)   | N2-Ce1-N4 | 79.12(4)   |
| N3-Ce1-N4        | 80.30(4)   |           |            |           |            |

**Table S5. Selected bond lengths (Å) and angles (°) for complex 2Ce.**

| Bond Lengths (Å) |           |           |           |           |           |
|------------------|-----------|-----------|-----------|-----------|-----------|
| Ce1-O1           | 2.092(12) | Ce1-N1    | 2.246(5)  | Ce1-N2    | 2.246(5)  |
| Ce1-N3           | 2.246(5)  | Ce1-N4    | 2.675(13) |           |           |
| Bond angles (°)  |           |           |           |           |           |
| N1-Ce1-N2        | 116.41(9) | N1-Ce1-N3 | 116.41(9) | N2-Ce1-N3 | 116.41(9) |
| O1-Ce1-N4        | 180.0     | N1-Ce1-N4 | 78.94(14) | N2-Ce1-N4 | 78.94(14) |
| N3-Ce1-N4        | 78.94(14) |           |           |           |           |



**Table S6. Selected bond lengths (Å) and angles (°) for complex 2Th.**

| Bond Lengths (Å) |           |            |           |           |           |
|------------------|-----------|------------|-----------|-----------|-----------|
| Th1-O1           | 2.173(4)  | Th1-N1     | 2.327(2)  | Th1-N2    | 2.327(2)  |
| Th1-N3           | 2.327(2)  | Th1-N4     | 2.738(5)  | Si4-O1    | 1.626(4)  |
| Bond angles (°)  |           |            |           |           |           |
| N1-Th1-N2        | 115.44(4) | N1-Th1-N3  | 115.44(4) | N2-Th1-N3 | 115.44(4) |
| O1-Th1-N4        | 180.0     | N1-Th1-N4  | 77.49(6)  | N2-Th1-N4 | 77.49(6)  |
| N3-Th1-N4        | 77.49(6)  | O1-Th1-Si4 | 180.0     |           |           |

**Table S7. Selected bond lengths (Å) and angles (°) for complex 2U.**

| Bond Lengths (Å) |           |           |           |          |           |
|------------------|-----------|-----------|-----------|----------|-----------|
| U1-O1            | 2.114(5)  | U1-N1     | 2.264(3)  | U1-N2    | 2.264(3)  |
| U1-N3            | 2.264(3)  | U1-N4     | 2.677(7)  | Si4-O1   | 1.621(6)  |
| Bond angles (°)  |           |           |           |          |           |
| N1-U1-N2         | 116.48(5) | N1-U1-N3  | 116.48(5) | N2-U1-N3 | 116.48(5) |
| O1-U1-N4         | 180.0     | N1-U1-N4  | 79.05(8)  | N2-U1-N4 | 79.05(8)  |
| N3-U1-N4         | 79.05(8)  | O1-U1-Si4 | 180.0     |          |           |

**Table S8. Shape analysis for the metal centers of 2M.**

| ML <sub>5</sub> | PP-5   | vOC-5 | TBPY-5       | SPY-5 | JTBPY-5 |
|-----------------|--------|-------|--------------|-------|---------|
| <b>2Ce</b>      | 37.234 | 7.633 | <b>0.689</b> | 6.057 | 2.304   |
| <b>2Th</b>      | 37.346 | 7.800 | <b>0.877</b> | 6.227 | 2.502   |
| <b>2U</b>       | 37.234 | 7.629 | <b>0.669</b> | 6.037 | 2.345   |

PP-5: Pentagon

vOC-5: Vacant octahedron

TBPY-5: Trigonal bipyramid

SPY-5: Square pyramid

JTBPY-5: Johnson trigonal bipyramid

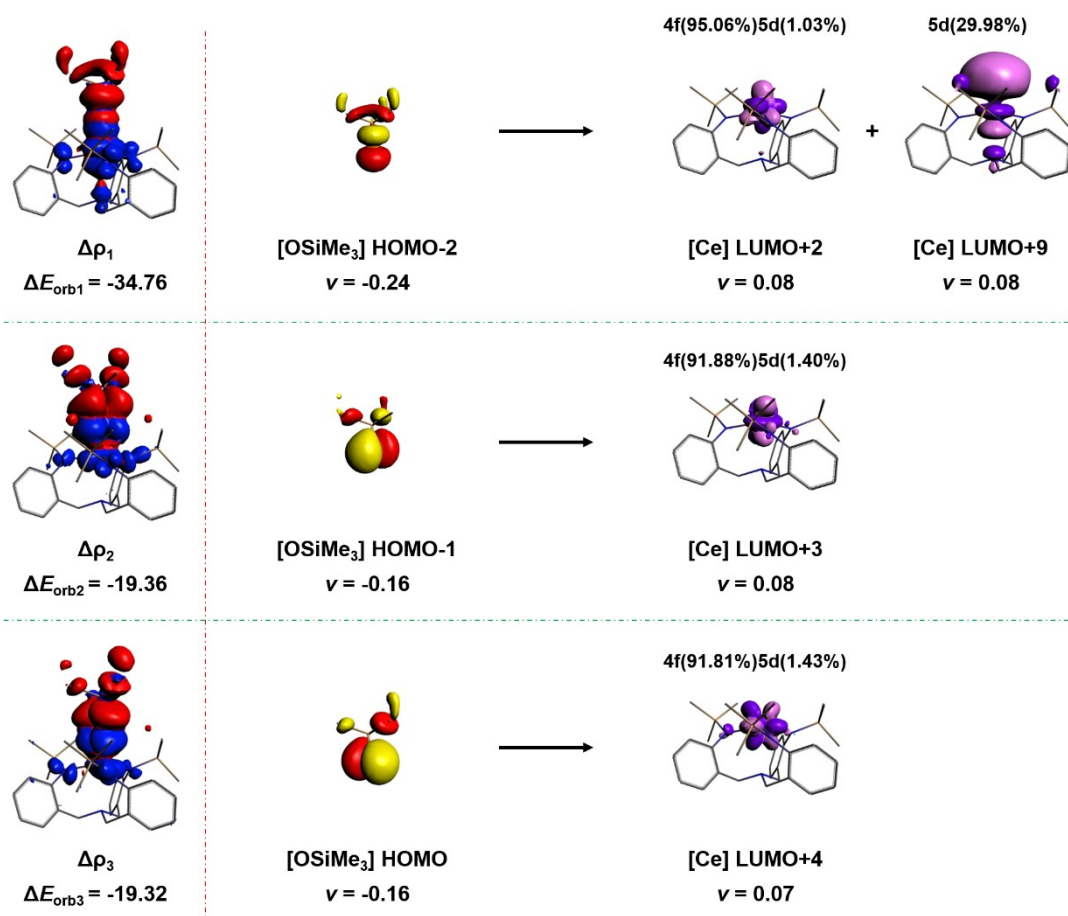

**Figure S38.** NOCV with larger deformation density ( $\Delta\rho$ ) of the main pairwise orbital interaction in **2Ce** complex between the [Ce] and [OTMS] fragments together with the associated interaction energies  $\Delta E_{orb}$ . The charge eigenvalues ( $\nu$ ) give an estimate of the relative size of the charge migration. The direction of the charge flow is red to blue, and hydrogen atoms have been omitted for clarity. The isodensity value is set to 0.0003 au.

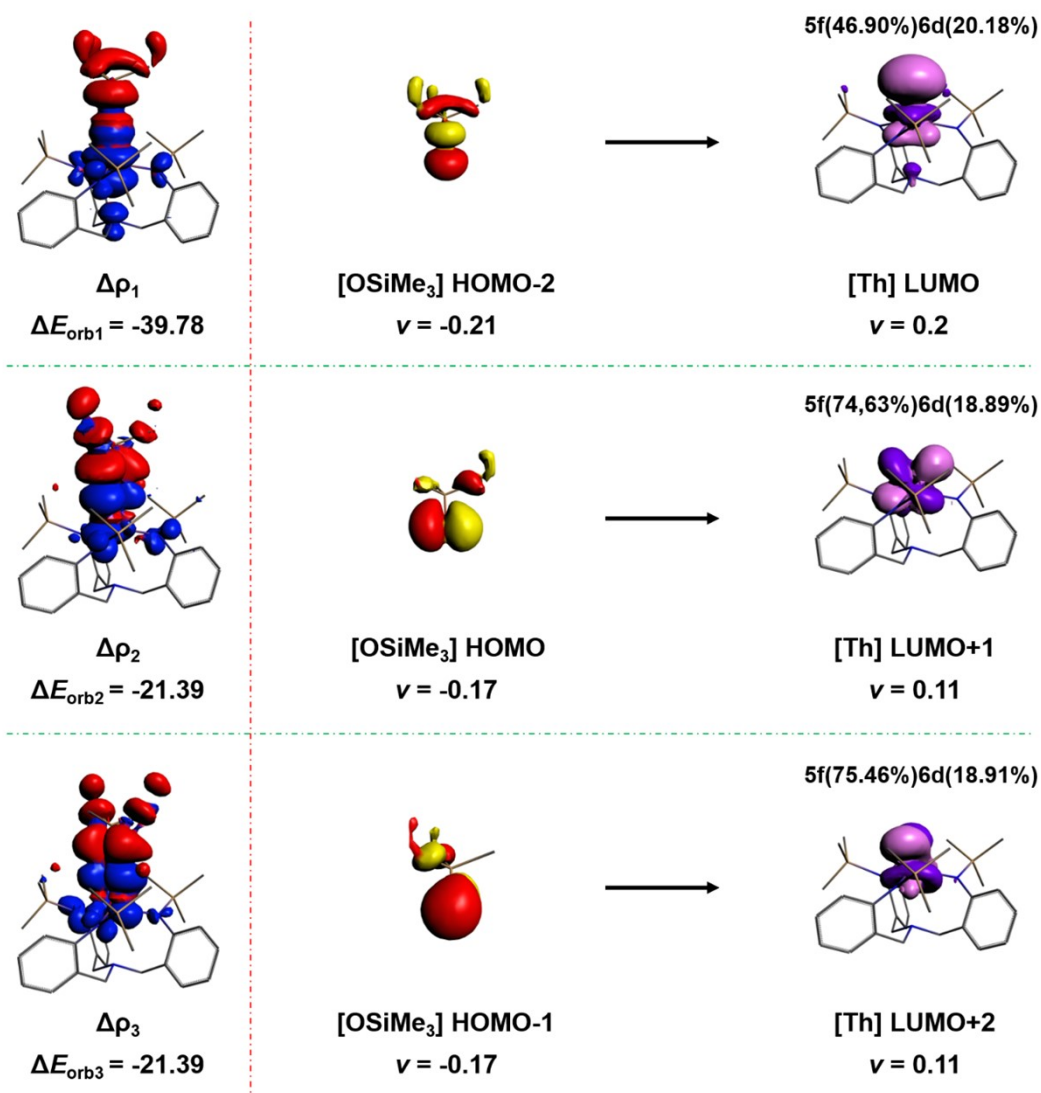

**Figure S39.** NOCV with larger deformation density ( $\Delta\rho$ ) of the main pairwise orbital interaction in **2Th** complex between the [Th] and [OTMS] fragments together with the associated interaction energies  $\Delta E_{orb}$ . The charge eigenvalues ( $\nu$ ) give an estimate of the relative size of the charge migration. The direction of the charge flow is red to blue, and hydrogen atoms have been omitted for clarity. The isodensity value is set to 0.0003 au.

**Table S9.** Final Coordinates of Geometry Optimized **2Ce**.

|    |          |          |          |
|----|----------|----------|----------|
| Ce | -0.00153 | -0.0019  | 0.29602  |
| O  | -0.01003 | -0.01858 | 2.42908  |
| Si | -0.01283 | -0.02804 | 4.10822  |
| N  | 0.00662  | 0.01401  | -2.43925 |
| N  | -2.19027 | -0.58945 | -0.15639 |

|    |          |          |          |
|----|----------|----------|----------|
| N  | 1.60769  | -1.59955 | -0.15006 |
| N  | 0.58261  | 2.19303  | -0.1312  |
| C  | -1.34769 | -0.38182 | -2.93135 |
| C  | 1.03084  | -0.95806 | -2.92819 |
| C  | 0.34047  | 1.38989  | -2.91714 |
| Si | -3.65186 | 0.1496   | 0.53407  |
| C  | -2.29965 | -1.72412 | -0.98644 |
| Si | 1.69485  | -3.23993 | 0.52872  |
| C  | 2.65192  | -1.1213  | -0.96866 |
| Si | 1.95564  | 3.08494  | 0.56048  |
| C  | -0.34599 | 2.86321  | -0.95453 |
| C  | 1.59882  | -0.80696 | 4.74497  |
| C  | -0.14918 | 1.75257  | 4.75668  |
| C  | -1.49151 | -1.0411  | 4.73808  |
| H  | -1.32354 | -0.45262 | -4.04313 |
| H  | -2.03116 | 0.4413   | -2.65979 |
| C  | -1.85663 | -1.6799  | -2.34843 |
| H  | 1.09034  | -0.8947  | -4.03908 |
| H  | 0.65672  | -1.96309 | -2.66685 |
| C  | 2.40417  | -0.75344 | -2.33132 |
| H  | 0.26512  | 1.41622  | -4.02856 |
| H  | 1.39562  | 1.56716  | -2.64589 |
| C  | -0.52888 | 2.47298  | -2.32114 |
| C  | -4.67729 | -1.02453 | 1.63213  |
| C  | -3.10018 | 1.61645  | 1.60006  |
| C  | -4.77262 | 0.76628  | -0.87428 |
| C  | -2.83196 | -2.95718 | -0.51122 |
| C  | 3.21254  | -3.54587 | 1.64185  |
| C  | 0.13647  | -3.50748 | 1.57359  |
| C  | 1.74146  | -4.50836 | -0.88855 |
| C  | 3.98143  | -0.96675 | -0.48067 |
| C  | 1.45516  | 4.55526  | 1.6667   |
| C  | 2.95465  | 1.87017  | 1.61837  |
| C  | 3.0466   | 3.75434  | -0.84721 |
| C  | -1.14855 | 3.93459  | -0.46708 |
| H  | 2.48328  | -0.24456 | 4.39481  |
| H  | 1.70459  | -1.84982 | 4.39519  |
| H  | 1.62556  | -0.81979 | 5.85064  |
| H  | -1.0763  | 2.2394   | 4.4037   |
| H  | 0.7031   | 2.36855  | 4.41712  |
| H  | -0.15901 | 1.77427  | 5.86249  |
| H  | -1.44708 | -2.08445 | 4.37668  |
| H  | -2.44869 | -0.60812 | 4.39545  |
| H  | -1.513   | -1.06962 | 5.84358  |

|   |          |          |          |
|---|----------|----------|----------|
| C | -1.95582 | -2.82894 | -3.15627 |
| C | 3.45594  | -0.26092 | -3.12747 |
| C | -1.47471 | 3.14221  | -3.12137 |
| H | -4.06744 | -1.47045 | 2.43856  |
| H | -5.1393  | -1.84553 | 1.05616  |
| H | -5.49727 | -0.45478 | 2.10961  |
| H | -2.6724  | 2.43006  | 0.98836  |
| H | -2.34946 | 1.31861  | 2.35339  |
| H | -3.97147 | 2.03107  | 2.14058  |
| H | -5.03198 | -0.05393 | -1.56822 |
| H | -4.27504 | 1.56246  | -1.45687 |
| H | -5.71863 | 1.17907  | -0.47666 |
| C | -2.92739 | -4.0864  | -1.33401 |
| H | -3.16464 | -3.00955 | 0.52995  |
| H | 3.28387  | -2.80091 | 2.45488  |
| H | 4.16081  | -3.52958 | 1.07638  |
| H | 3.12564  | -4.54463 | 2.11081  |
| H | -0.77379 | -3.54334 | 0.94961  |
| H | 0.0066   | -2.71324 | 2.32991  |
| H | 0.20944  | -4.47222 | 2.10947  |
| H | 2.58906  | -4.31542 | -1.57115 |
| H | 0.81     | -4.47441 | -1.48196 |
| H | 1.85549  | -5.53643 | -0.49676 |
| C | 5.0142   | -0.48042 | -1.29194 |
| H | 4.18407  | -1.23345 | 0.56115  |
| H | 0.76962  | 4.24658  | 2.47656  |
| H | 0.97005  | 5.36673  | 1.09629  |
| H | 2.36078  | 4.98072  | 2.13979  |
| H | 3.43704  | 1.09046  | 1.00318  |
| H | 2.32755  | 1.37249  | 2.37906  |
| H | 3.75663  | 2.41549  | 2.15012  |
| H | 2.46414  | 4.39267  | -1.53632 |
| H | 3.4862   | 2.92857  | -1.43525 |
| H | 3.87783  | 4.36534  | -0.44822 |
| C | -2.07913 | 4.59076  | -1.28237 |
| H | -1.02758 | 4.23716  | 0.57758  |
| H | -1.62146 | -2.76732 | -4.20007 |
| C | -2.48623 | -4.0318  | -2.66691 |
| H | 3.24465  | 0.00238  | -4.17204 |
| C | 4.75833  | -0.12033 | -2.62574 |
| H | -1.58823 | 2.83379  | -4.16879 |
| C | -2.25193 | 4.19679  | -2.61993 |
| H | -3.34487 | -5.01575 | -0.92892 |
| H | 6.02397  | -0.37839 | -0.87715 |

|   |          |          |          |
|---|----------|----------|----------|
| H | -2.67581 | 5.41185  | -0.86779 |
| H | -2.55763 | -4.91055 | -3.31663 |
| H | 5.56071  | 0.26034  | -3.26661 |
| H | -2.97744 | 4.70503  | -3.26394 |

**Table S10. Final Coordinates of Geometry Optimized 2Th.**

|    |          |          |          |
|----|----------|----------|----------|
| Th | -0.00105 | 3.41E-04 | 0.32228  |
| O  | -0.00804 | 0.00128  | 2.49801  |
| Si | -0.01291 | 0.00456  | 4.18006  |
| N  | -0.06995 | 2.29374  | -0.1741  |
| N  | 0.00708  | -0.00247 | -2.43854 |
| N  | -1.95085 | -1.20829 | -0.17579 |
| N  | 2.02176  | -1.08666 | -0.16478 |
| Si | -1.23379 | 3.45284  | 0.49851  |
| C  | 0.96599  | 2.75631  | -1.02495 |
| C  | -0.03253 | 1.40931  | -2.94335 |
| C  | 1.25205  | -0.67331 | -2.93799 |
| C  | -1.19397 | -0.74459 | -2.94484 |
| Si | -2.37465 | -2.79266 | 0.5028   |
| C  | -2.86646 | -0.54633 | -1.03275 |
| Si | 3.60416  | -0.65819 | 0.51547  |
| C  | 1.90948  | -2.21384 | -1.01797 |
| C  | 0.51926  | 1.71588  | 4.80696  |
| C  | 1.19937  | -1.31154 | 4.81486  |
| C  | -1.76256 | -0.38679 | 4.80478  |
| C  | -2.1399  | 4.3547   | -0.90931 |
| C  | -2.48135 | 2.44281  | 1.51333  |
| C  | -0.46513 | 4.76679  | 1.64551  |
| C  | 1.0485   | 2.3032   | -2.37994 |
| C  | 1.96809  | 3.65817  | -0.57223 |
| H  | -1.02521 | 1.80817  | -2.67144 |
| H  | 0.03555  | 1.39261  | -4.05476 |
| H  | 2.09229  | -0.01313 | -2.66119 |
| H  | 1.20905  | -0.72261 | -4.04968 |
| C  | 1.48329  | -2.05709 | -2.37513 |
| H  | -1.04377 | -1.80272 | -2.66875 |
| H  | -1.20974 | -0.68121 | -4.05654 |
| C  | -2.51067 | -0.25362 | -2.3877  |
| C  | -0.87786 | -3.36486 | 1.52193  |
| C  | -2.70113 | -4.03367 | -0.90068 |
| C  | -3.89874 | -2.77874 | 1.64737  |
| C  | -4.15057 | -0.12878 | -0.58644 |
| C  | 4.35244  | -1.98142 | 1.66532  |
| C  | 3.34835  | 0.92718  | 1.52927  |

|   |          |          |          |
|---|----------|----------|----------|
| C | 4.84492  | -0.3236  | -0.88634 |
| C | 2.18804  | -3.53298 | -0.56559 |
| H | -0.1675  | 2.50366  | 4.44771  |
| H | 1.53548  | 1.97324  | 4.45699  |
| H | 0.52531  | 1.7549   | 5.91222  |
| H | 0.91562  | -2.32072 | 4.4649   |
| H | 1.22459  | -1.33468 | 5.9203   |
| H | 2.22682  | -1.11143 | 4.46044  |
| H | -2.49272 | 0.3628   | 4.44927  |
| H | -1.80183 | -0.39526 | 5.91003  |
| H | -2.10065 | -1.3773  | 4.44998  |
| H | -2.82478 | 5.12804  | -0.51421 |
| H | -2.73933 | 3.64878  | -1.51224 |
| H | -1.42466 | 4.85773  | -1.58549 |
| H | -3.19004 | 3.12952  | 2.01313  |
| H | -1.99577 | 1.84308  | 2.30485  |
| H | -3.07985 | 1.76511  | 0.87758  |
| H | 0.18406  | 5.47281  | 1.09791  |
| H | 0.13421  | 4.30583  | 2.45163  |
| H | -1.26746 | 5.36135  | 2.12265  |
| C | 2.10152  | 2.74629  | -3.20462 |
| C | 3.00234  | 4.09363  | -1.41142 |
| H | 1.92099  | 4.00709  | 0.46441  |
| C | 1.34593  | -3.18954 | -3.20216 |
| C | -3.4184  | 0.43302  | -3.21828 |
| H | -0.60077 | -2.64133 | 2.31041  |
| H | 0.00851  | -3.54832 | 0.88767  |
| H | -1.11993 | -4.31938 | 2.02585  |
| H | -3.49363 | -3.66826 | -1.5791  |
| H | -1.78945 | -4.20214 | -1.50204 |
| H | -3.02893 | -5.01199 | -0.50234 |
| H | -3.80012 | -2.02648 | 2.45102  |
| H | -4.01392 | -3.76909 | 2.12784  |
| H | -4.83376 | -2.57094 | 1.09754  |
| C | -5.04231 | 0.54519  | -1.43149 |
| H | 3.65032  | -2.26984 | 2.46866  |
| H | 5.26693  | -1.58464 | 2.14612  |
| H | 4.64075  | -2.89673 | 1.11862  |
| H | 3.06525  | 1.78465  | 0.89191  |
| H | 4.29475  | 1.19659  | 2.03462  |
| H | 2.5815   | 0.80737  | 2.31641  |
| H | 4.92721  | -1.19463 | -1.56188 |
| H | 5.8549   | -0.11596 | -0.48629 |
| H | 4.53543  | 0.548    | -1.4911  |

|   |          |          |          |
|---|----------|----------|----------|
| C | 2.05348  | -4.64536 | -1.40705 |
| H | 2.50839  | -3.66761 | 0.4726   |
| H | 2.13967  | 2.39326  | -4.24343 |
| C | 3.07937  | 3.63618  | -2.73735 |
| H | 3.75525  | 4.79005  | -1.02369 |
| H | 1.02696  | -3.04488 | -4.24261 |
| C | 1.62598  | -4.48178 | -2.73512 |
| C | -4.67996 | 0.83585  | -2.75719 |
| H | -3.12827 | 0.63855  | -4.25694 |
| H | -6.02357 | 0.84965  | -1.04855 |
| H | 2.27881  | -5.64598 | -1.01949 |
| H | 3.88562  | 3.97048  | -3.39897 |
| H | 1.51672  | -5.34631 | -3.39858 |
| H | -5.37057 | 1.3638   | -3.42343 |
| H | -4.43284 | -0.3405  | 0.44994  |

**Table S11. Final Coordinates of Geometry Optimized 2U.**

|    |          |          |          |
|----|----------|----------|----------|
| U  | -0.04167 | -0.09436 | 0.26238  |
| O  | -0.20663 | -0.62566 | 2.29889  |
| Si | -0.28169 | -1.02498 | 3.93421  |
| N  | 0.12539  | 0.52879  | -2.34943 |
| N  | -2.26942 | -0.12102 | -0.28746 |
| N  | 1.43244  | -1.702   | -0.42177 |
| N  | 0.95986  | 1.96905  | 0.33086  |
| C  | -1.25609 | 0.52942  | -2.93244 |
| C  | 0.95566  | -0.51698 | -3.03165 |
| C  | 0.75006  | 1.87692  | -2.5542  |
| Si | -3.4475  | -1.42388 | 0.01205  |
| C  | -2.72907 | 1.0598   | -0.92492 |
| Si | 3.05128  | -2.12134 | 0.17879  |
| C  | 0.82415  | -2.49173 | -1.42994 |
| Si | 0.40804  | 3.36848  | 1.2855   |
| C  | 2.14082  | 2.12076  | -0.44236 |
| C  | -2.22753 | 1.43489  | -2.21139 |
| H  | -1.61369 | -0.5139  | -2.89018 |
| H  | -1.18884 | 0.8249   | -4.00374 |
| C  | 0.53111  | -1.93247 | -2.7152  |
| H  | 1.99504  | -0.35354 | -2.69903 |
| H  | 0.91542  | -0.34518 | -4.13076 |
| C  | 2.08419  | 2.04693  | -1.86982 |
| H  | 0.02756  | 2.61328  | -2.1624  |
| H  | 0.86052  | 2.05551  | -3.64756 |
| C  | 0.90305  | 0.09247  | 4.90871  |
| C  | -2.05495 | -0.76813 | 4.55886  |



|   |          |          |          |
|---|----------|----------|----------|
| C | 0.22004  | -2.84191 | 4.15646  |
| C | -2.51637 | -2.89027 | 0.77114  |
| C | -4.23004 | -1.95964 | -1.63739 |
| C | -4.85417 | -0.93873 | 1.20356  |
| C | -3.6896  | 1.91633  | -0.31963 |
| C | 3.40046  | -1.02511 | 1.68506  |
| C | 4.34421  | -1.79552 | -1.17716 |
| C | 3.22407  | -3.93908 | 0.72506  |
| C | 0.45428  | -3.84757 | -1.20355 |
| C | -1.17022 | 2.87028  | 2.21218  |
| C | 0.02694  | 4.82448  | 0.12208  |
| C | 1.66966  | 3.96564  | 2.58403  |
| C | 3.41252  | 2.3453   | 0.15183  |
| C | -2.68304 | 2.61813  | -2.82492 |
| C | -0.09964 | -2.72288 | -3.69746 |
| C | 3.26142  | 2.18481  | -2.62933 |
| H | 1.94581  | -0.02893 | 4.56442  |
| H | 0.87526  | -0.14425 | 5.98874  |
| H | 0.63454  | 1.15804  | 4.79235  |
| H | -2.37562 | 0.2815   | 4.43014  |
| H | -2.13896 | -1.016   | 5.63344  |
| H | -2.77027 | -1.40689 | 4.01028  |
| H | -0.45619 | -3.51555 | 3.59977  |
| H | 0.18757  | -3.13777 | 5.22164  |
| H | 1.24682  | -3.0217  | 3.78973  |
| H | -3.23564 | -3.69049 | 1.02846  |
| H | -1.98351 | -2.60796 | 1.6958   |
| H | -1.7809  | -3.31883 | 0.06724  |
| H | -4.685   | -1.10118 | -2.16411 |
| H | -5.02543 | -2.71058 | -1.47384 |
| H | -3.47489 | -2.40989 | -2.30705 |
| H | -5.5353  | -0.18684 | 0.76769  |
| H | -4.46377 | -0.53711 | 2.15614  |
| H | -5.46075 | -1.83343 | 1.44133  |
| C | -4.13436 | 3.08659  | -0.94896 |
| H | -4.07667 | 1.64481  | 0.66749  |
| H | 4.42691  | -1.21012 | 2.0531   |
| H | 2.70162  | -1.23933 | 2.51212  |
| H | 3.32908  | 0.04899  | 1.43967  |
| H | 4.10705  | -2.36137 | -2.09706 |
| H | 5.35441  | -2.1046  | -0.84907 |
| H | 4.38654  | -0.72244 | -1.43744 |
| H | 3.08875  | -4.64613 | -0.11224 |
| H | 2.49989  | -4.20332 | 1.5171   |

|   |          |          |          |
|---|----------|----------|----------|
| H | 4.23933  | -4.10187 | 1.13449  |
| C | -0.16061 | -4.61903 | -2.19728 |
| H | 0.66041  | -4.28141 | -0.22015 |
| H | -1.50276 | 3.71583  | 2.84374  |
| H | -1.00865 | 2.00187  | 2.87453  |
| H | -1.99791 | 2.63074  | 1.52166  |
| H | 0.89872  | 5.06743  | -0.51253 |
| H | -0.23171 | 5.73438  | 0.69527  |
| H | -0.82485 | 4.59109  | -0.54217 |
| H | 2.5768   | 4.39667  | 2.12561  |
| H | 1.98118  | 3.14797  | 3.25927  |
| H | 1.20738  | 4.75515  | 3.2069   |
| C | 4.57287  | 2.48696  | -0.62148 |
| H | 3.47395  | 2.40227  | 1.2431   |
| H | -2.29102 | 2.8817   | -3.81583 |
| C | -3.6314  | 3.44852  | -2.2096  |
| H | -0.30475 | -2.27733 | -4.67952 |
| C | -0.44538 | -4.05935 | -3.45516 |
| H | 3.19143  | 2.13018  | -3.72361 |
| C | 4.50704  | 2.40596  | -2.02213 |
| H | -4.87523 | 3.72082  | -0.44799 |
| H | -0.42574 | -5.66155 | -1.9853  |
| H | 5.53469  | 2.65863  | -0.12381 |
| H | -3.97431 | 4.36147  | -2.70805 |
| H | -0.92755 | -4.65676 | -4.23632 |
| H | 5.40963  | 2.51529  | -2.63276 |
